# Supplementary material
Source: ML conference proceedings conference paper supplement (https://openreview.net/forum?id=X4Ih3fYdH4)

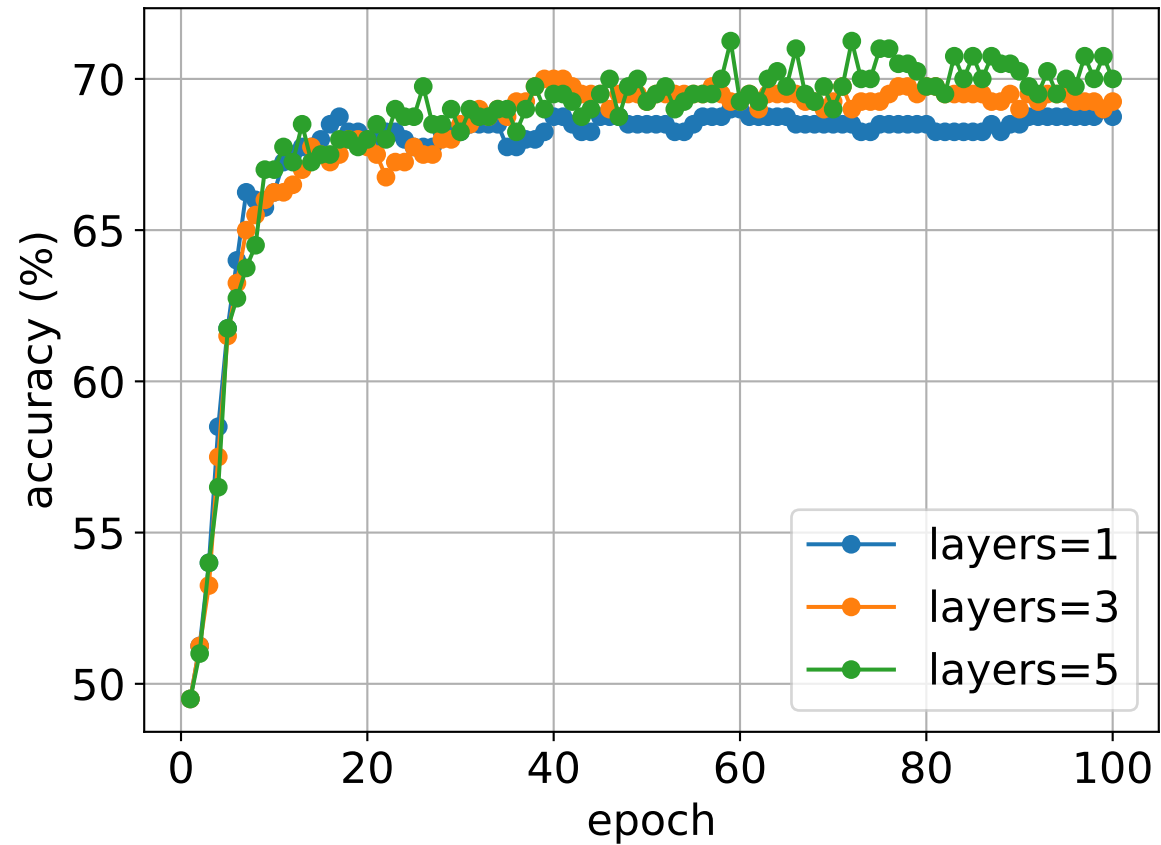

Supplement: supplementary_material [file ablate_layers_cifar_acc_vs_epoch_by_layers.pdf › rem/ablate_layers_cifar_acc_vs_epoch_by_layers.pdf]

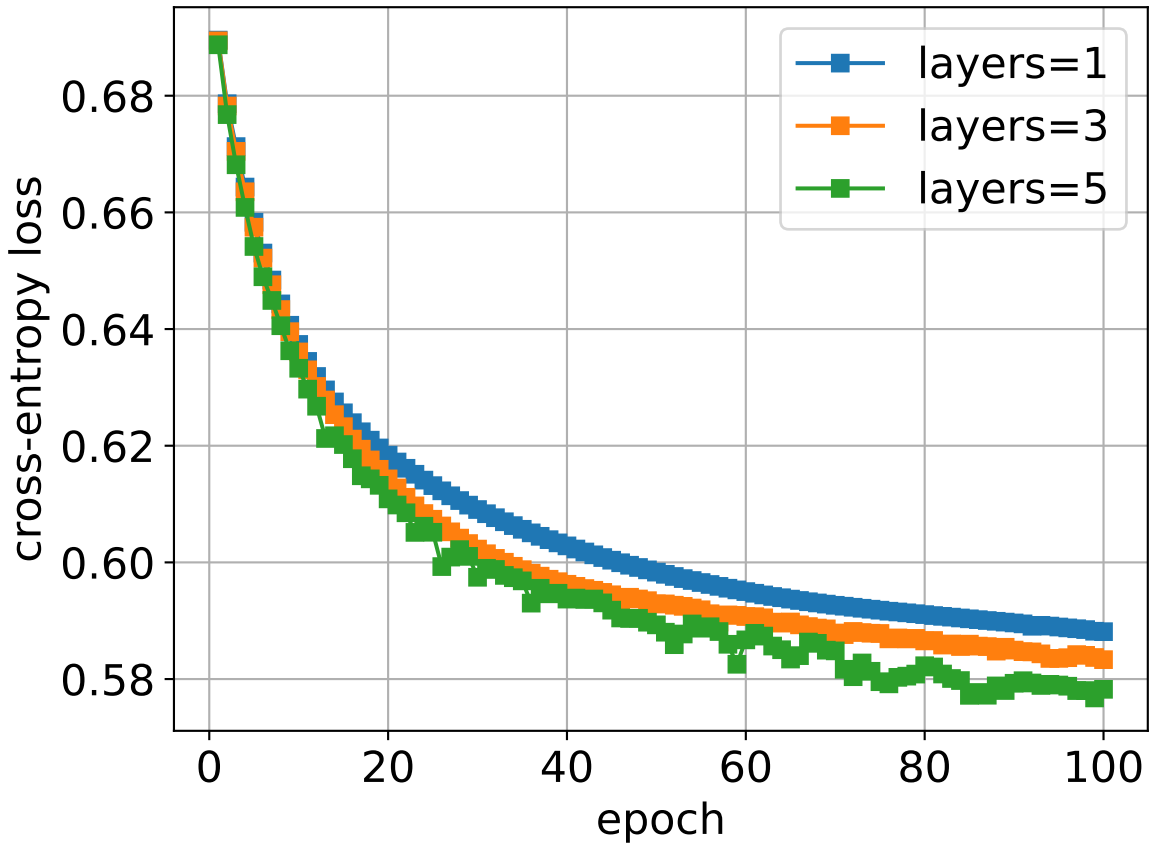

Supplement: supplementary_material [file ablate_layers_cifar_loss_vs_epoch_by_layers.pdf › rem/ablate_layers_cifar_loss_vs_epoch_by_layers.pdf]

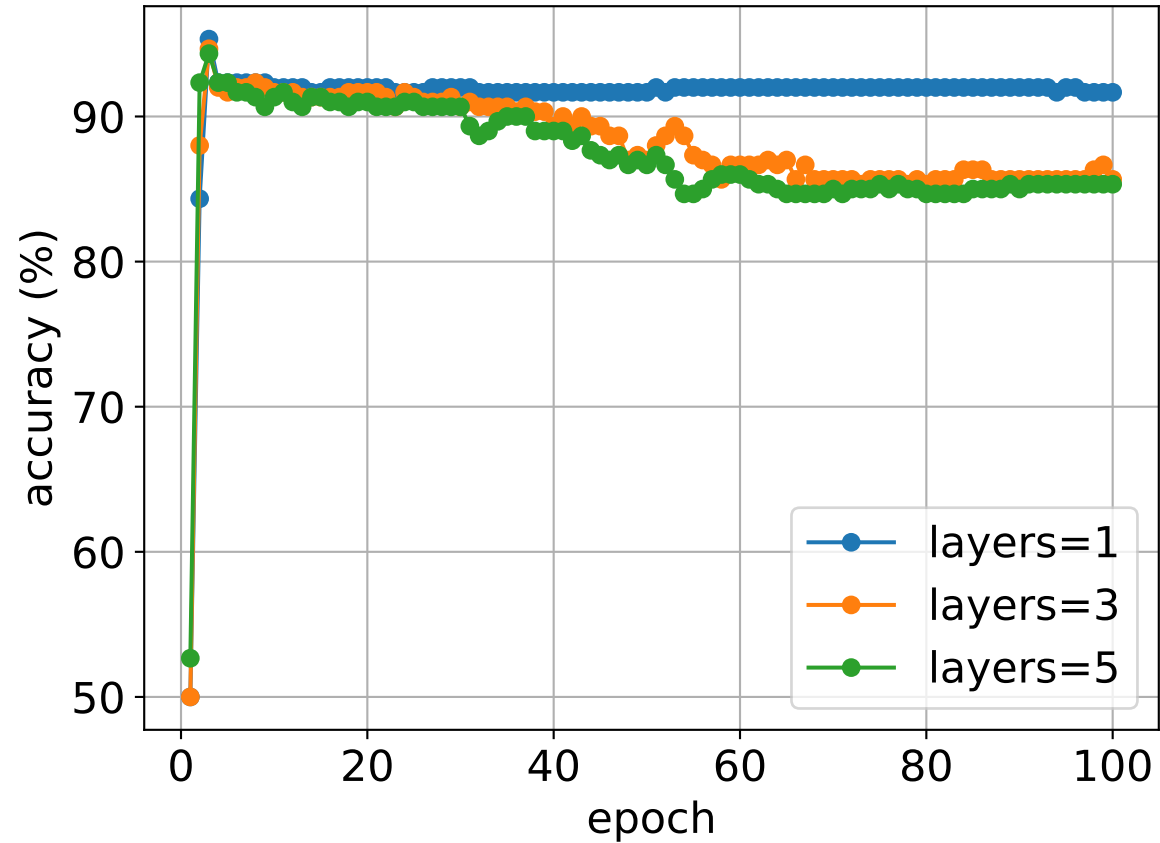

Supplement: supplementary_material [file ablate_layers_eurosat_acc_vs_epoch_by_layers.pdf › rem/ablate_layers_eurosat_acc_vs_epoch_by_layers.pdf]

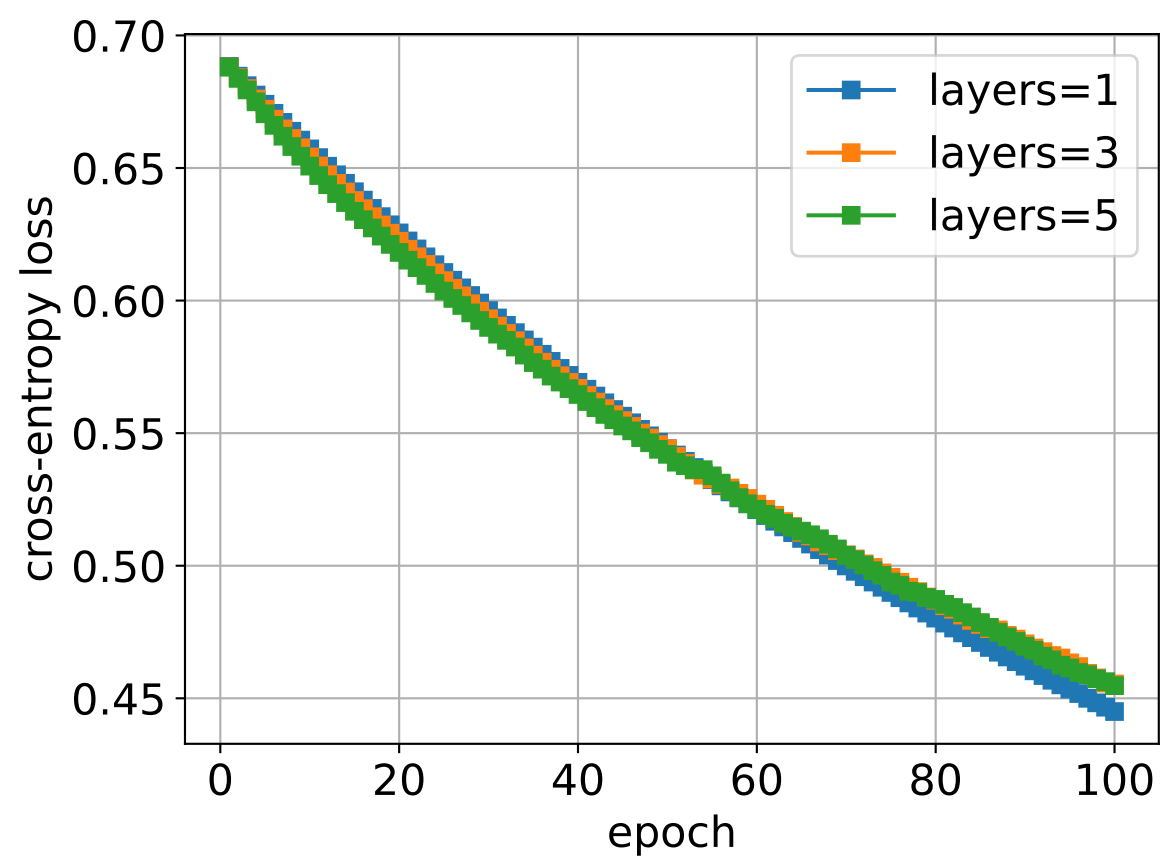

Supplement: supplementary_material [file ablate_layers_eurosat_loss_vs_epoch_by_layers.pdf › rem/ablate_layers_eurosat_loss_vs_epoch_by_layers.pdf]

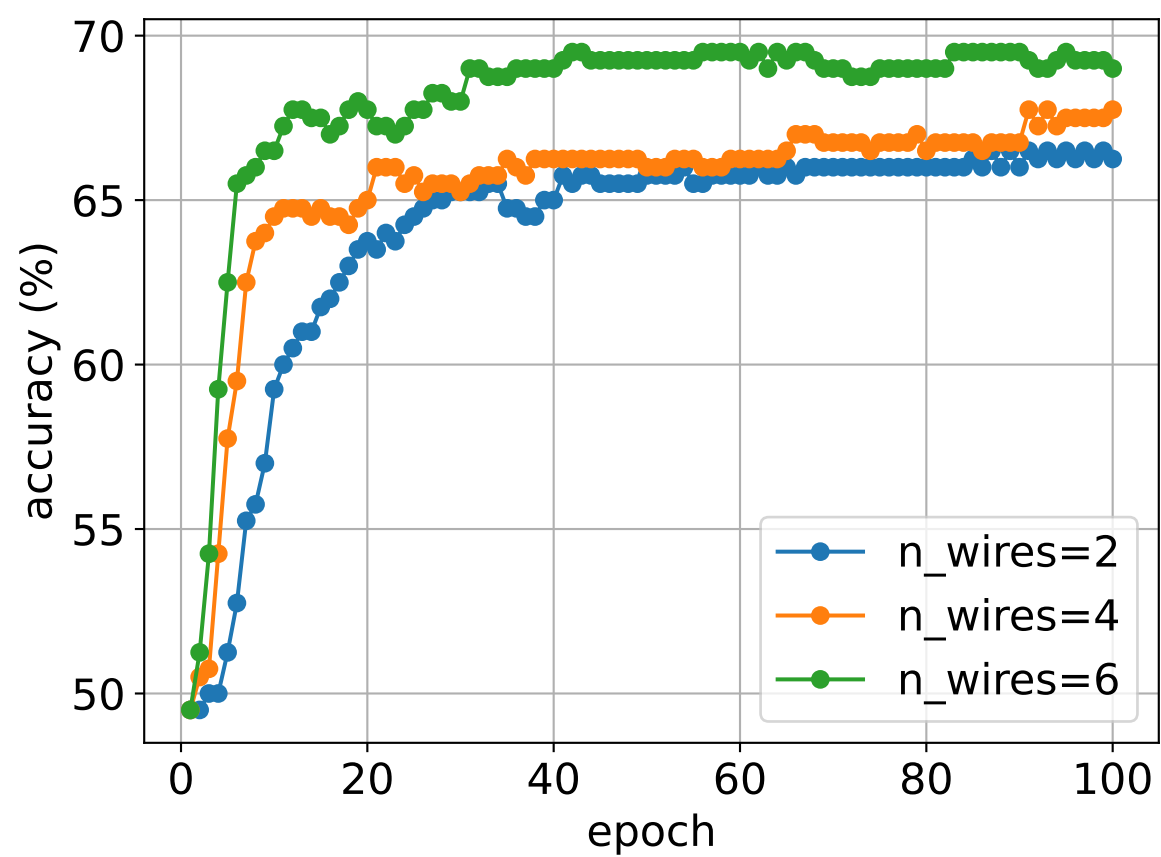

Supplement: supplementary_material [file ablate_qubits_cifar_acc_vs_epoch_by_qubits.pdf › rem/ablate_qubits_cifar_acc_vs_epoch_by_qubits.pdf]

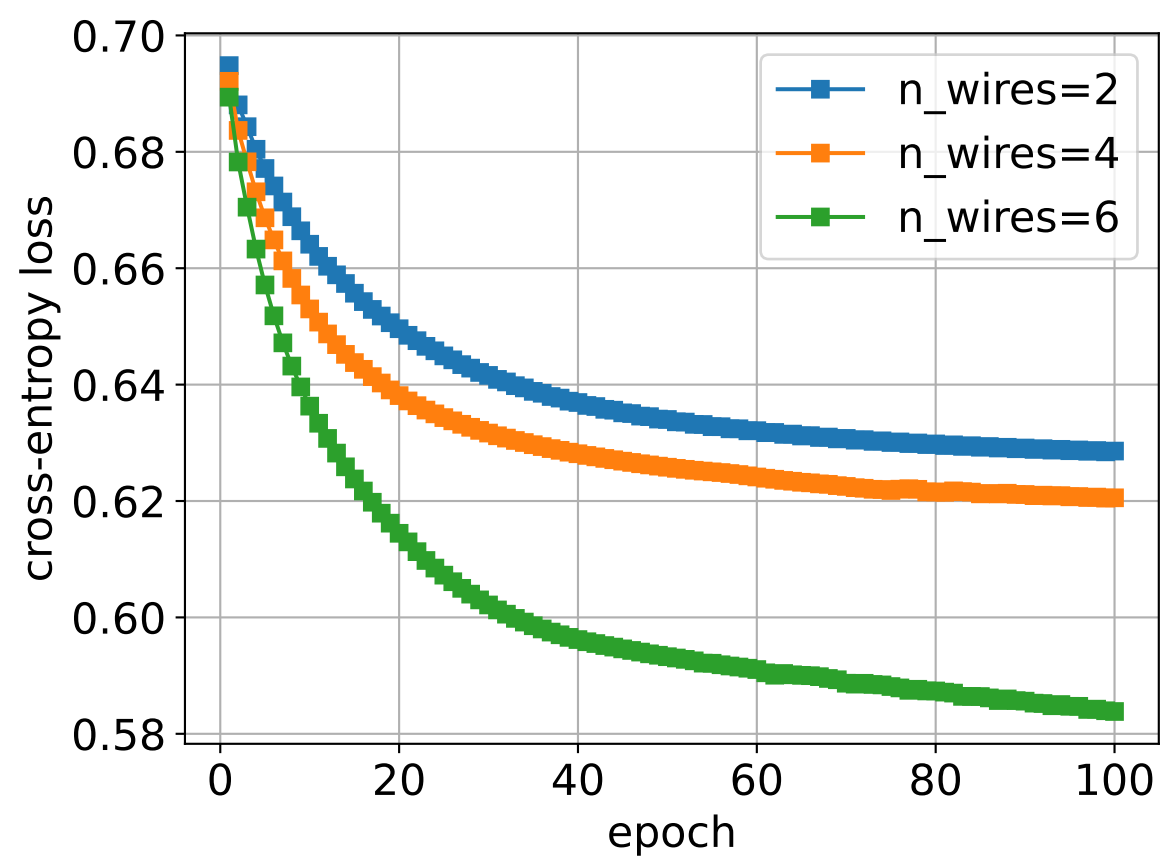

Supplement: supplementary_material [file ablate_qubits_cifar_loss_vs_epoch_by_qubits.pdf › rem/ablate_qubits_cifar_loss_vs_epoch_by_qubits.pdf]

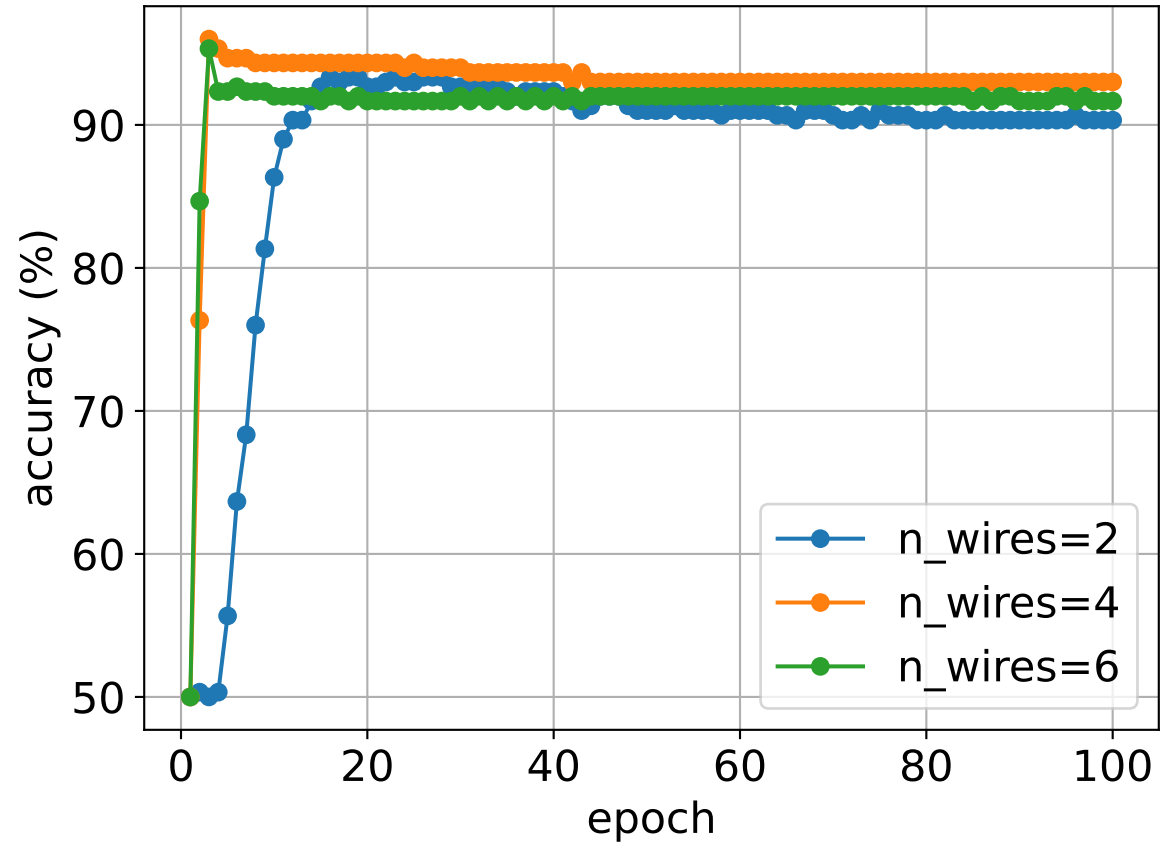

Supplement: supplementary_material [file ablate_qubits_eurosat_acc_vs_epoch_by_qubits.pdf › rem/ablate_qubits_eurosat_acc_vs_epoch_by_qubits.pdf]

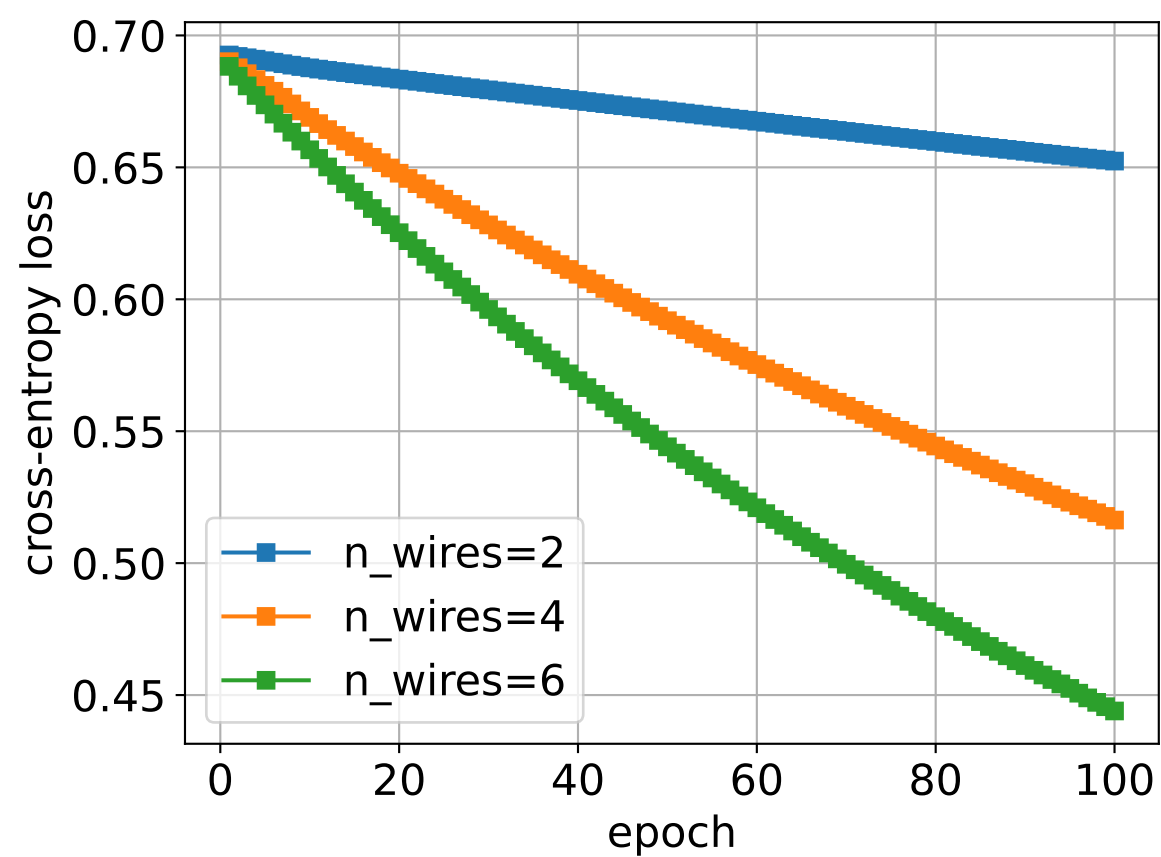

Supplement: supplementary_material [file ablate_qubits_eurosat_loss_vs_epoch_by_qubits.pdf › rem/ablate_qubits_eurosat_loss_vs_epoch_by_qubits.pdf]

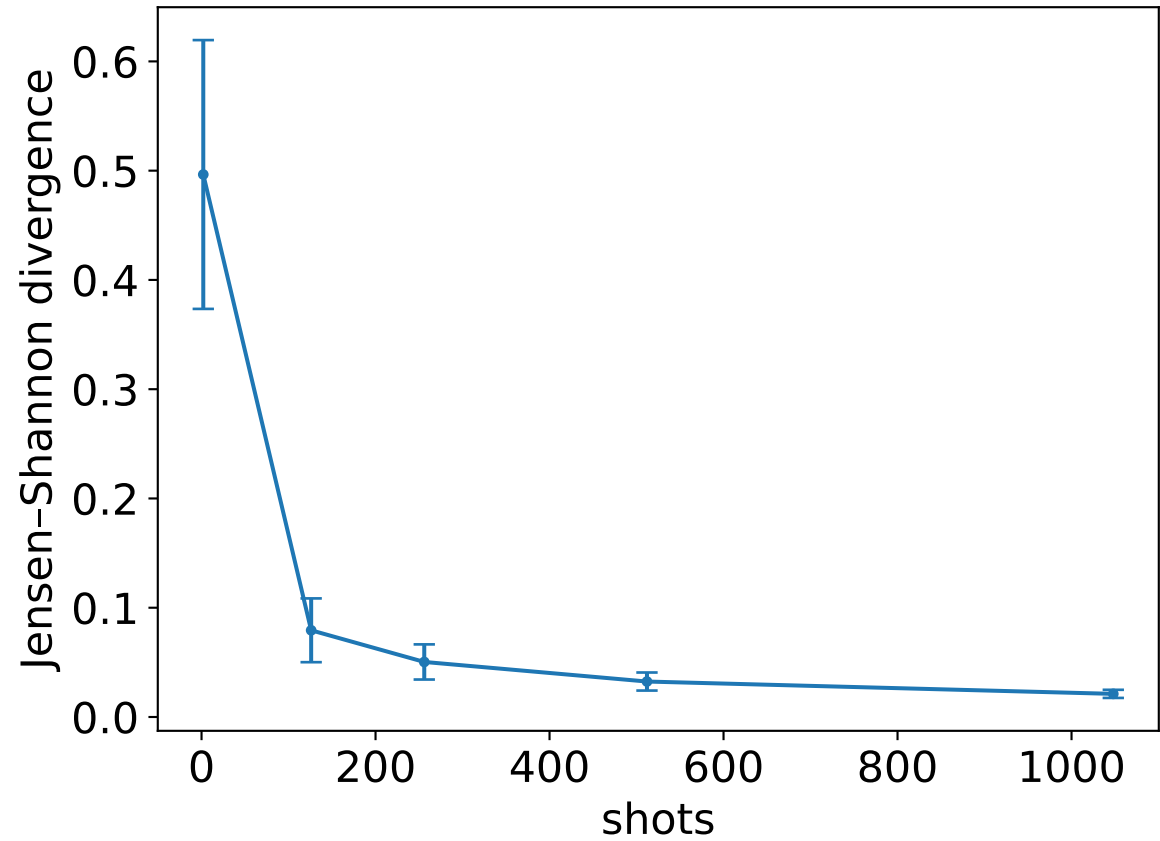

Supplement: supplementary_material [file eps002_jsd_vs_shots_cifar.pdf › rem/cifar/eps002_jsd_vs_shots_cifar.pdf]

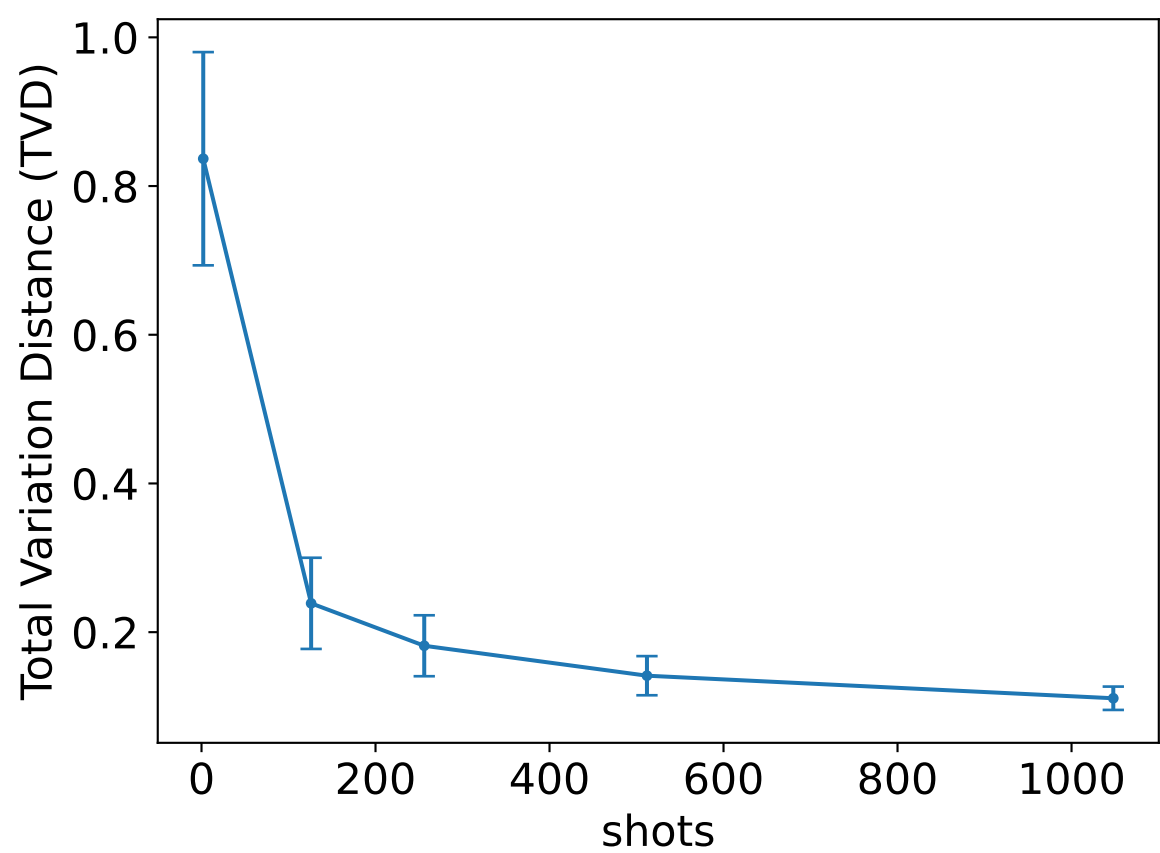

Supplement: supplementary_material [file eps002_tvd_vs_shots_cifar.pdf › rem/cifar/eps002_tvd_vs_shots_cifar.pdf]

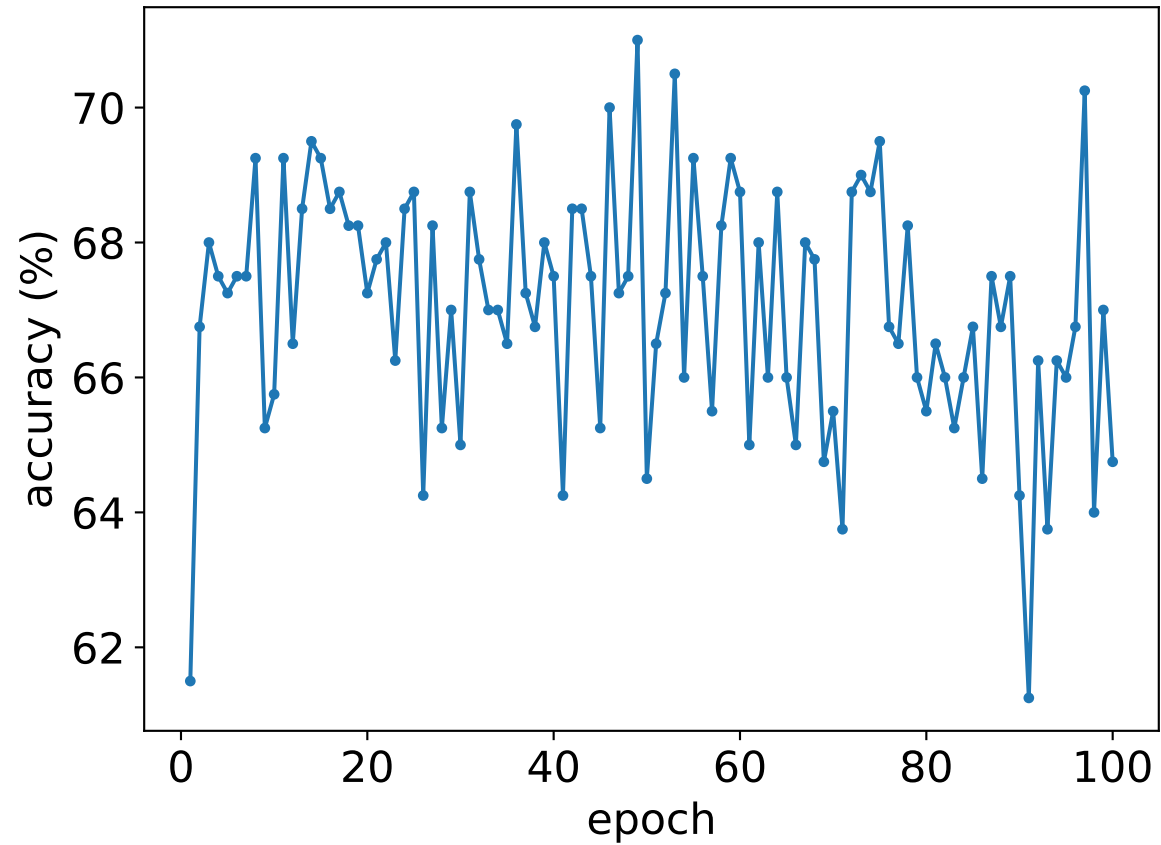

Supplement: supplementary_material [file fixed128_cifar_acc.pdf › rem/cifar/fixed128_cifar_acc.pdf]

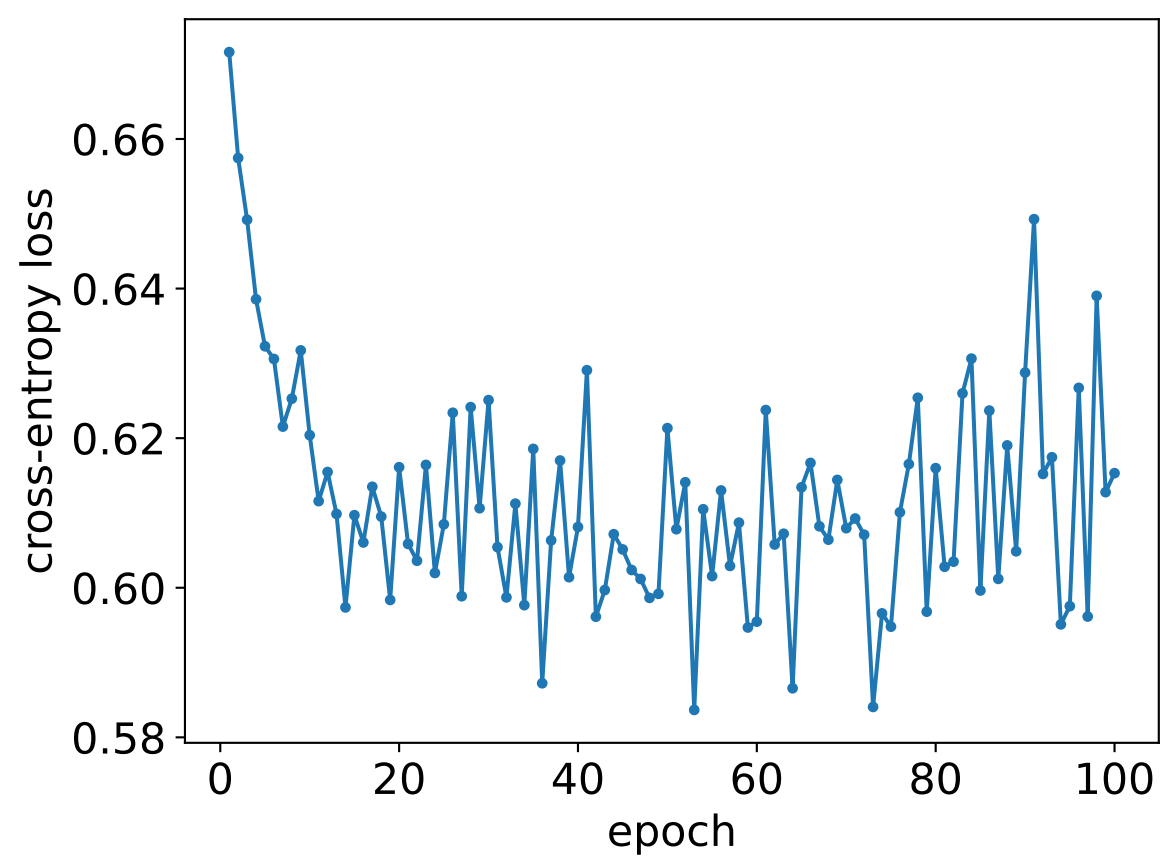

Supplement: supplementary_material [file fixed128_cifar_loss.pdf › rem/cifar/fixed128_cifar_loss.pdf]

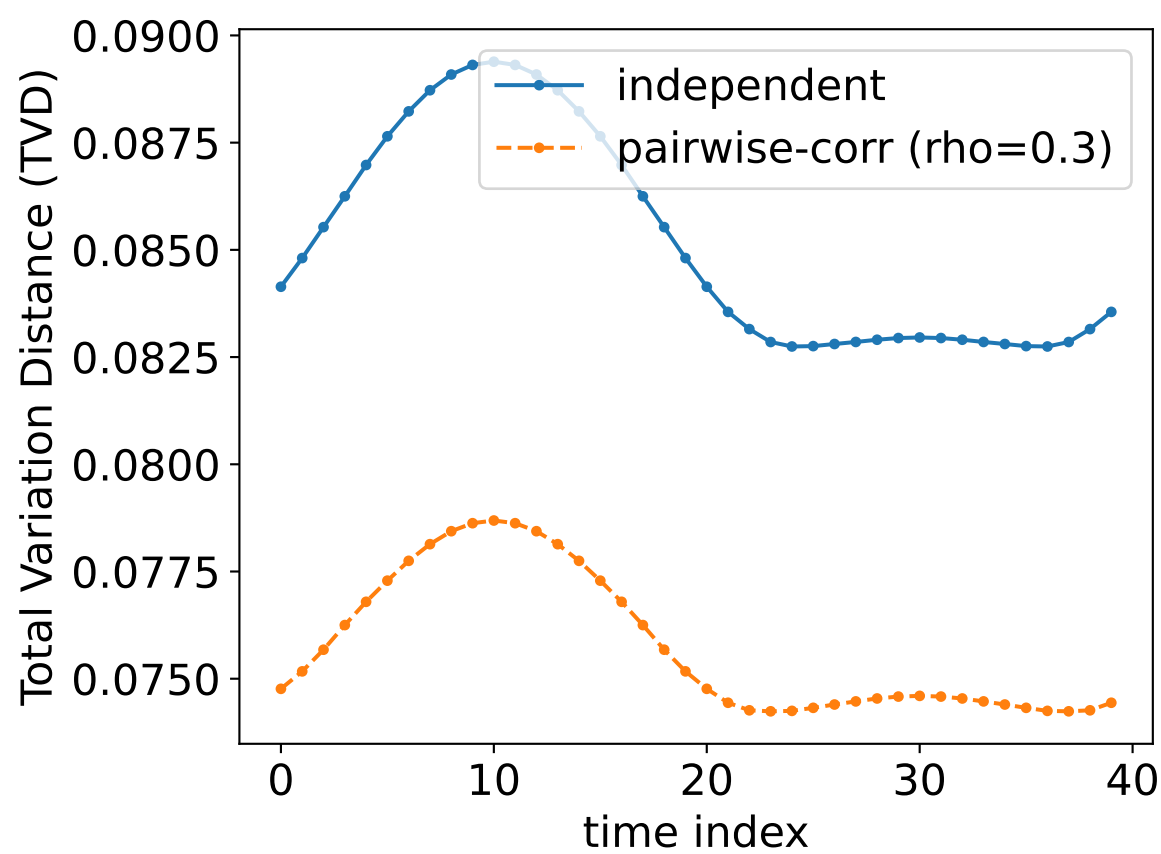

Supplement: supplementary_material [file readout_drift_cifar_tvd.pdf › rem/cifar/readout_drift_cifar_tvd.pdf]

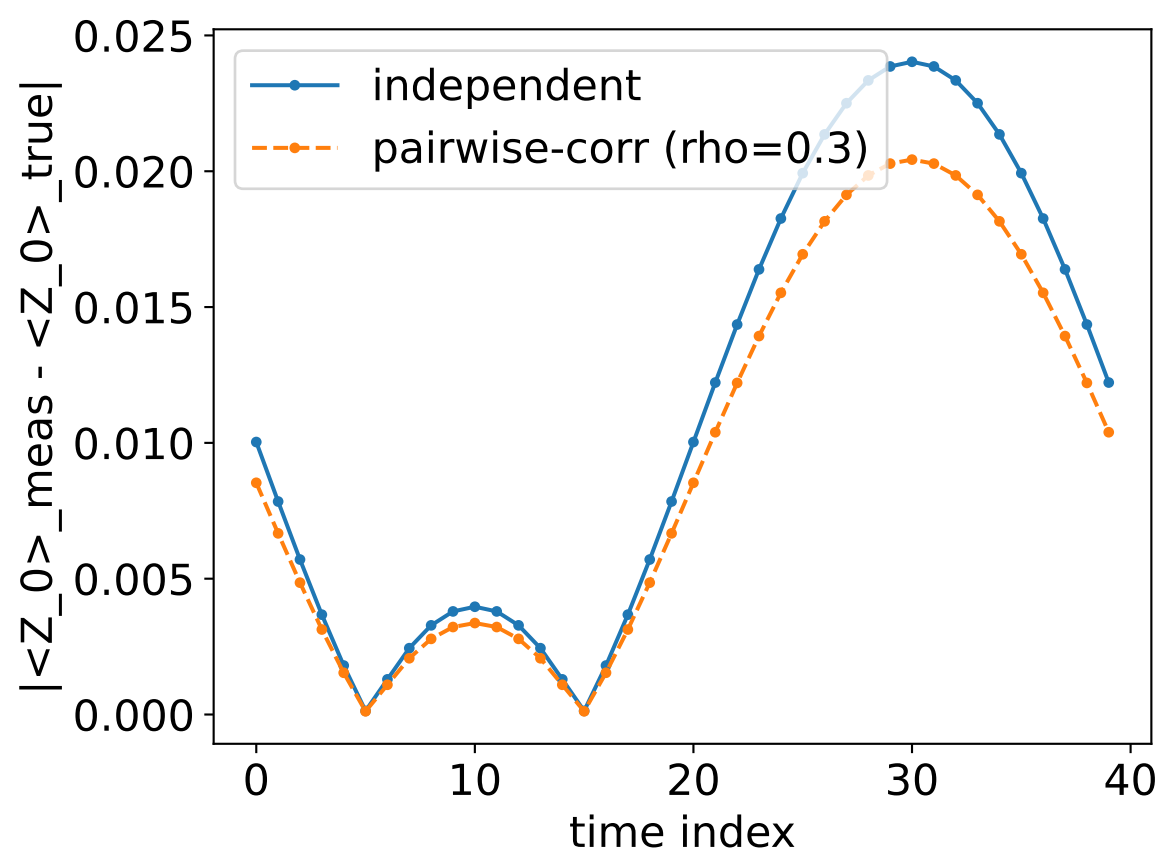

Supplement: supplementary_material [file readout_drift_cifar_z0err.pdf › rem/cifar/readout_drift_cifar_z0err.pdf]

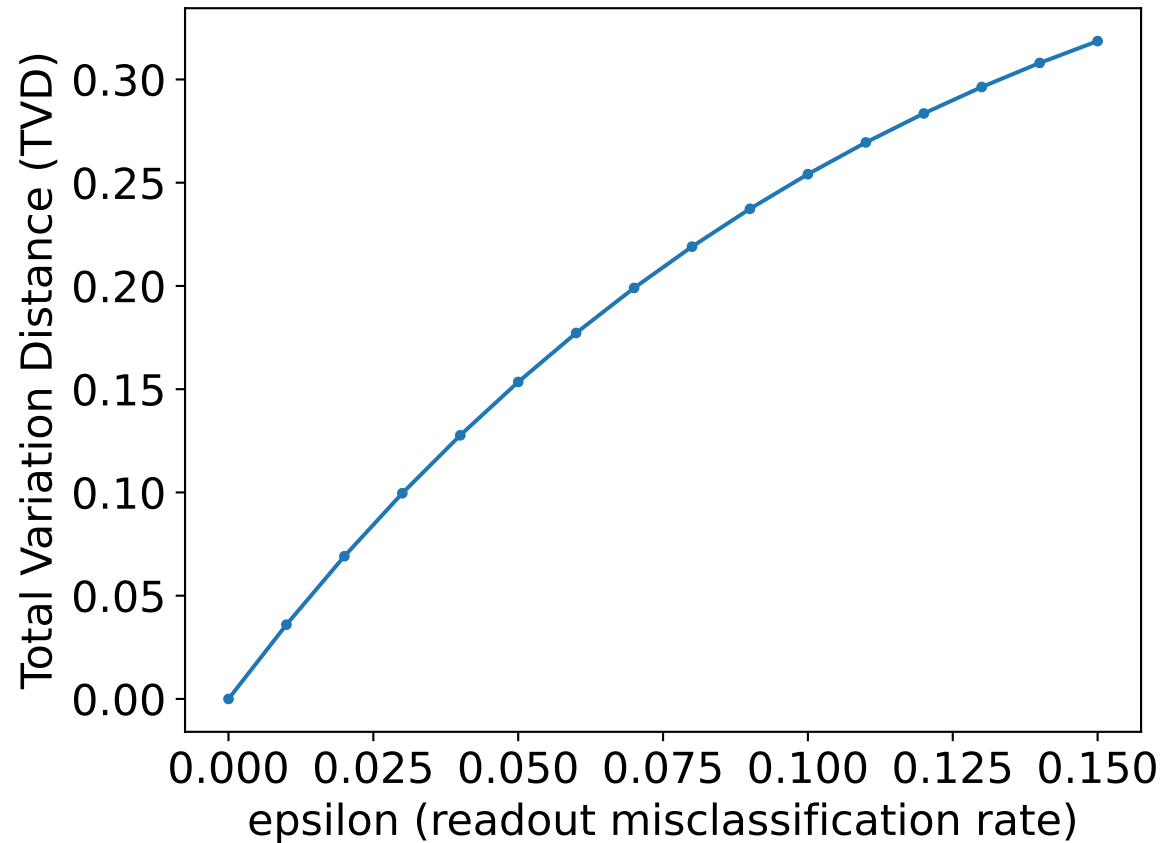

Supplement: supplementary_material [file readout_noise_effect_cifar_tvd.pdf › rem/cifar/readout_noise_effect_cifar_tvd.pdf]

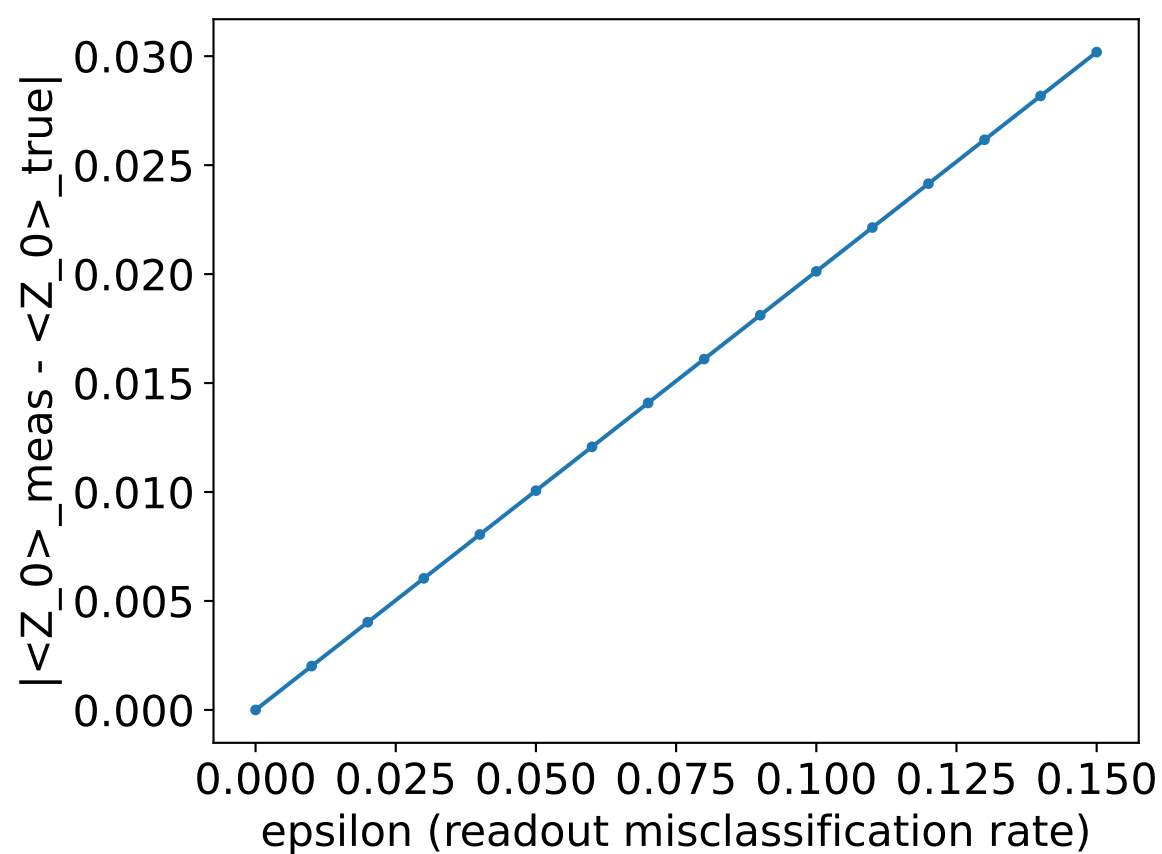

Supplement: supplementary_material [file readout_noise_effect_cifar_z0err.pdf › rem/cifar/readout_noise_effect_cifar_z0err.pdf]

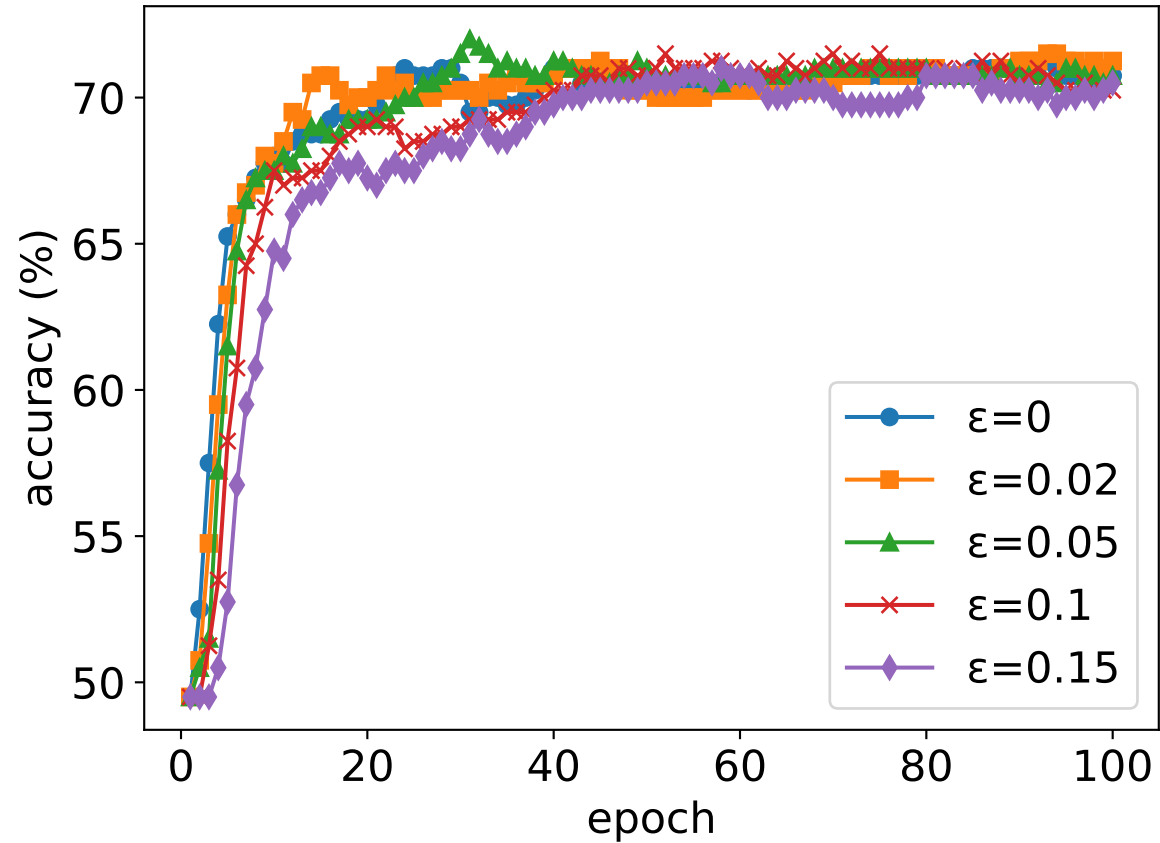

Supplement: supplementary_material [file readout_train_cifar_acc.pdf › rem/cifar/readout_train_cifar_acc.pdf]

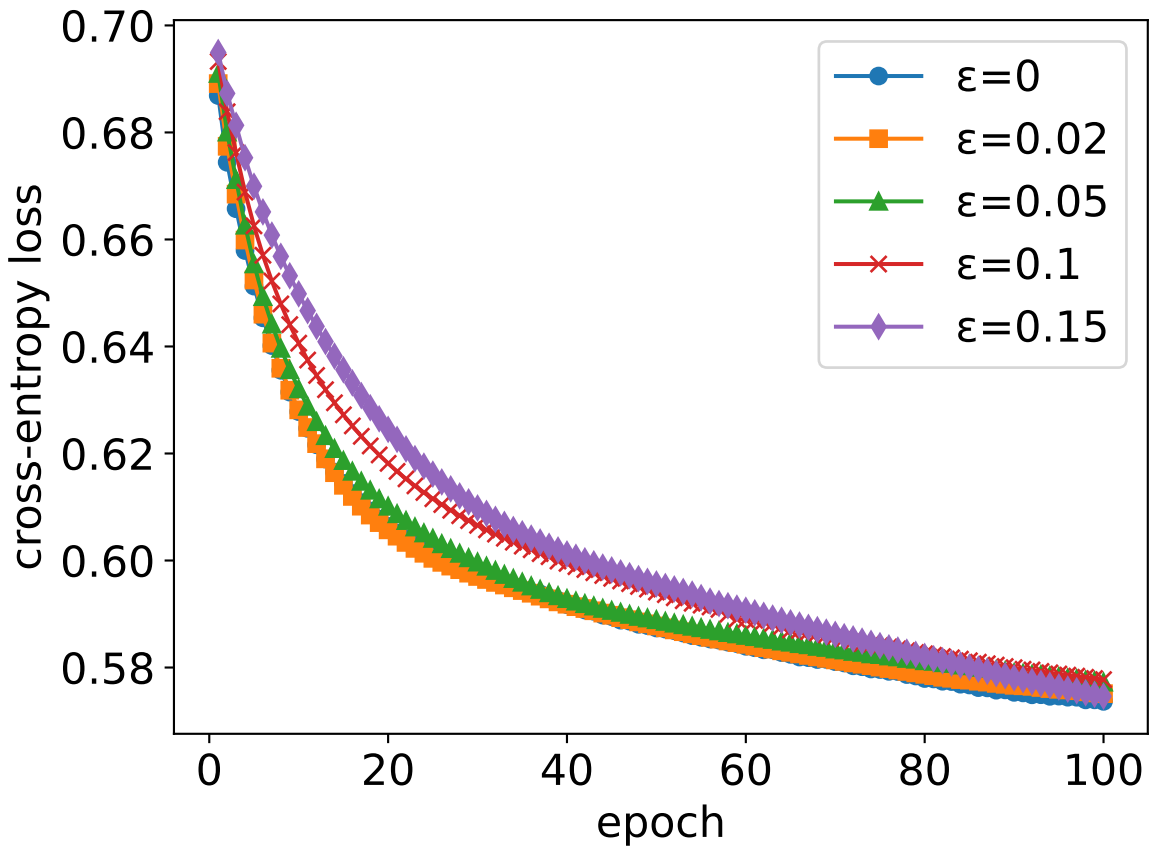

Supplement: supplementary_material [file readout_train_cifar_loss.pdf › rem/cifar/readout_train_cifar_loss.pdf]

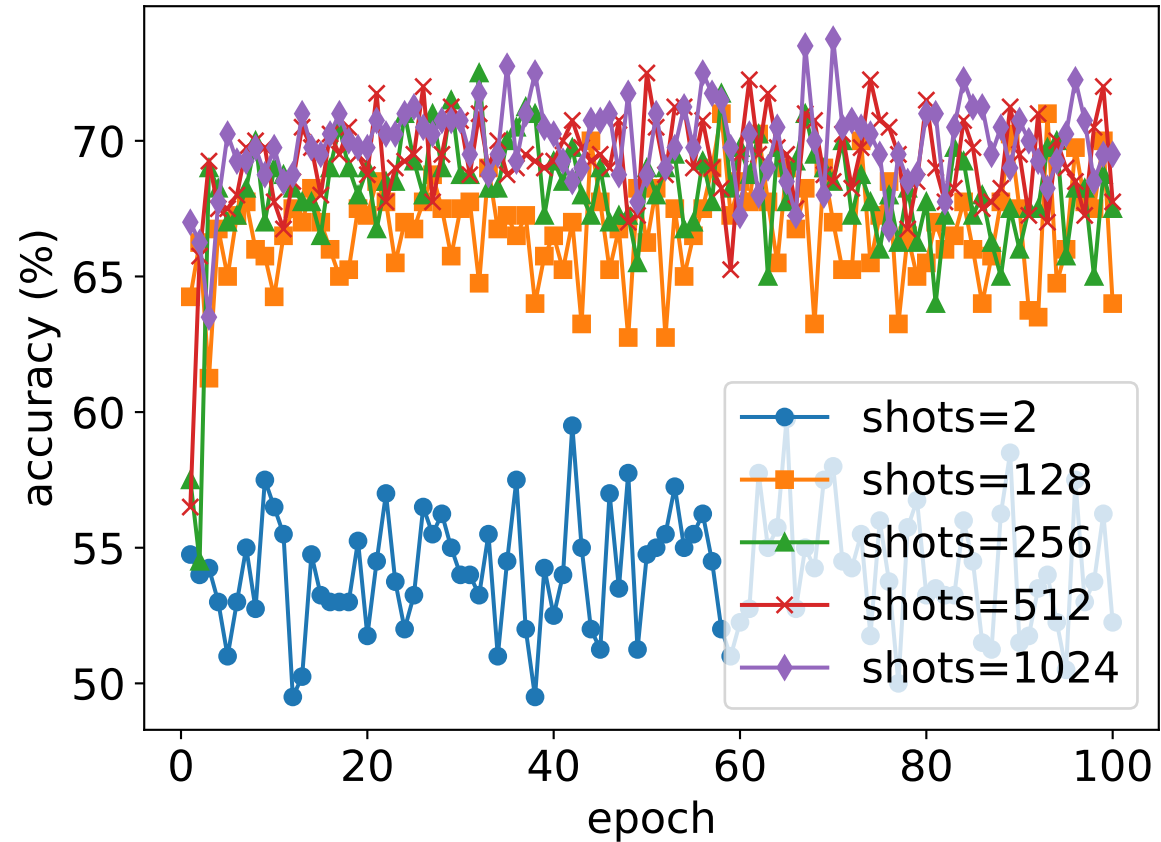

Supplement: supplementary_material [file shots_fast_cifar_acc.pdf › rem/cifar/shots_fast_cifar_acc.pdf]

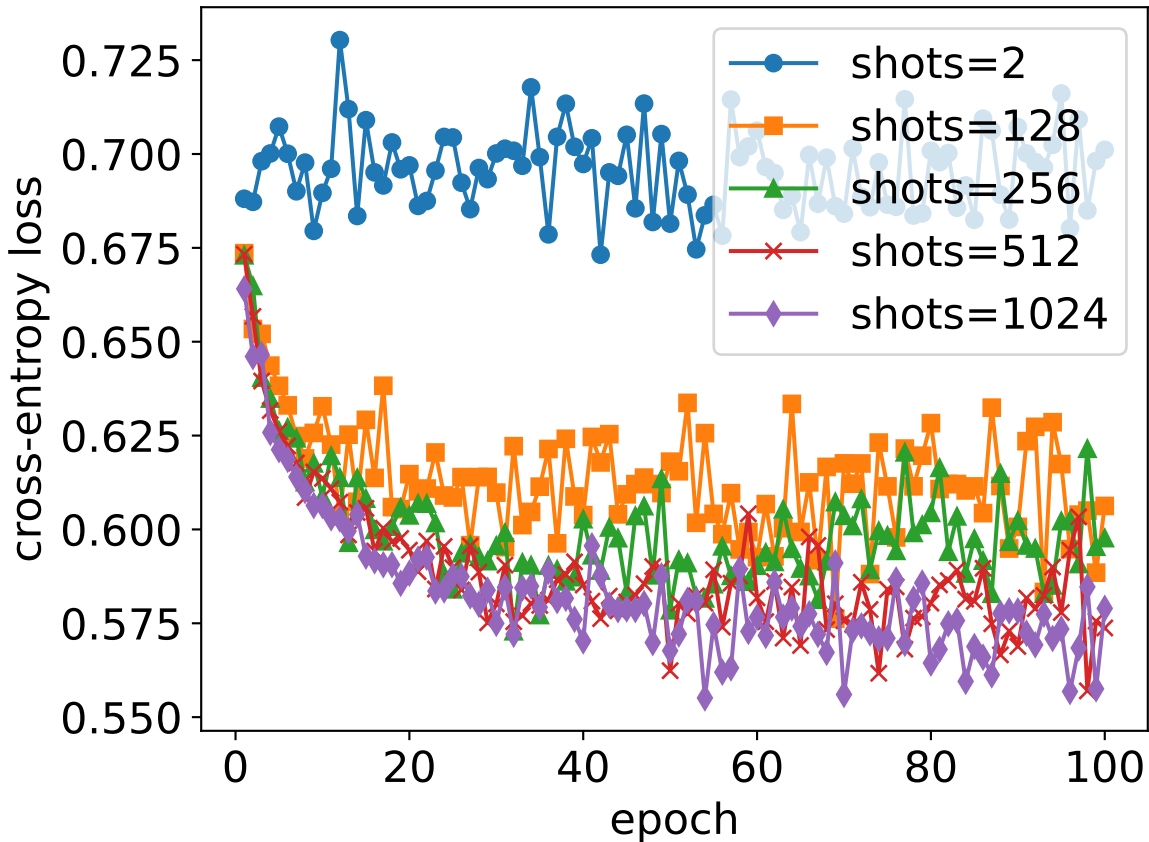

Supplement: supplementary_material [file shots_fast_cifar_loss.pdf › rem/cifar/shots_fast_cifar_loss.pdf]

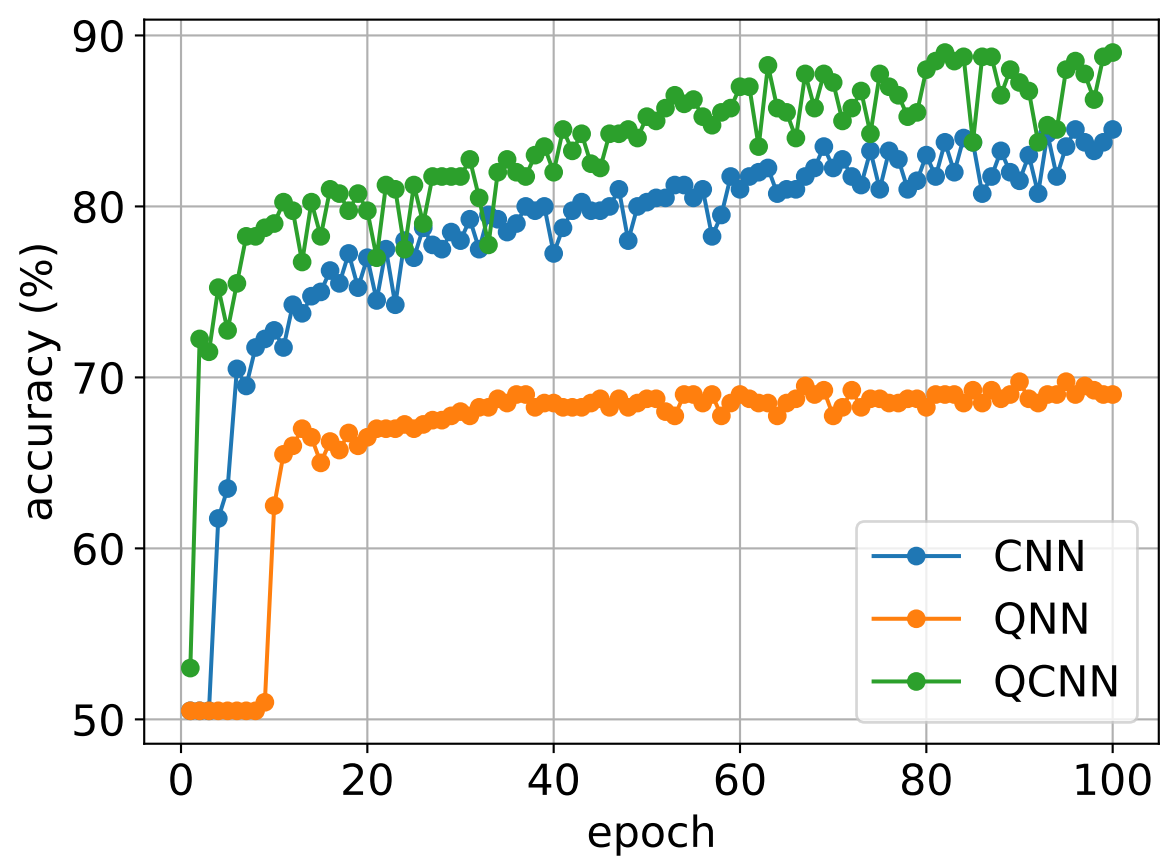

Supplement: supplementary_material [file compare_cifar_6q_3L_acc_vs_epoch.pdf › rem/compare_cifar_6q_3L_acc_vs_epoch.pdf]

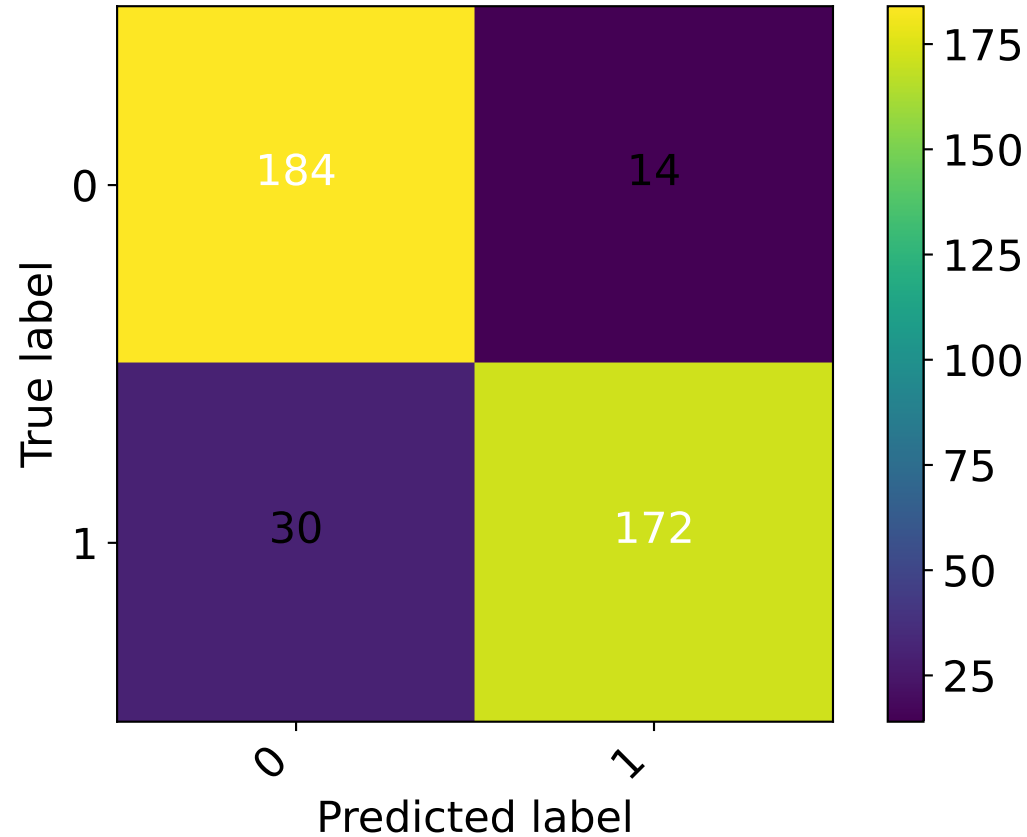

Supplement: supplementary_material [file compare_cifar_6q_3L_cm_cnn.pdf › rem/compare_cifar_6q_3L_cm_cnn.pdf]

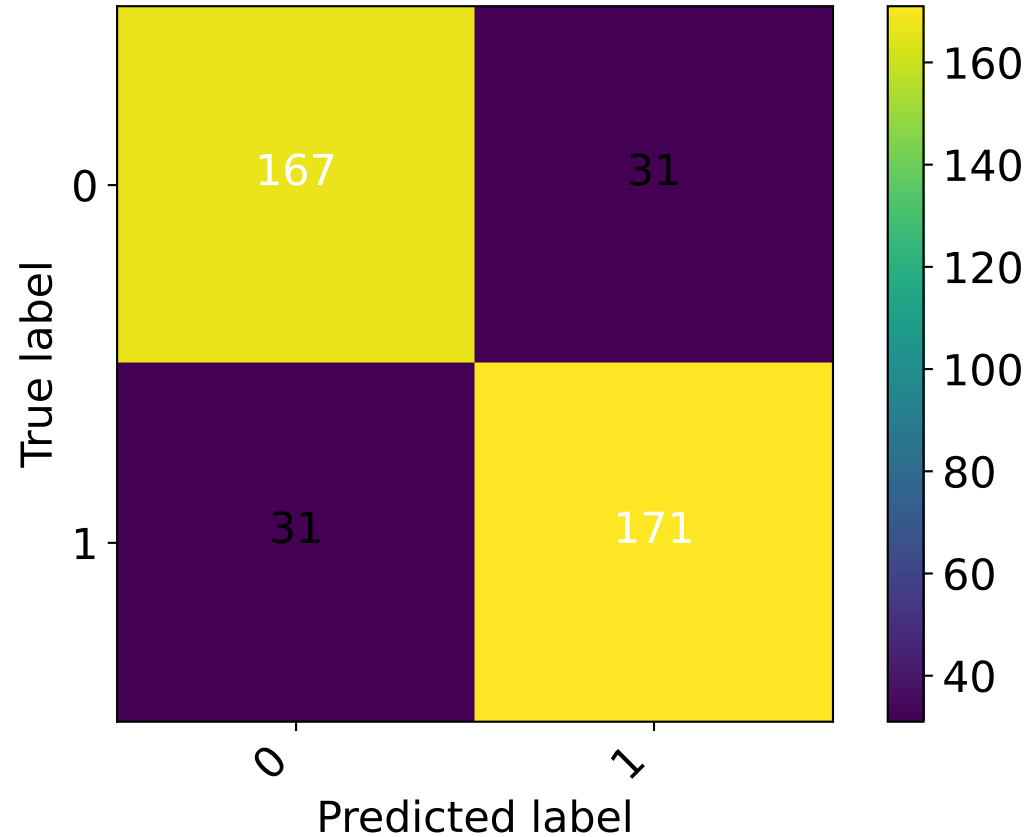

Supplement: supplementary_material [file compare_cifar_6q_3L_cm_qcnn.pdf › rem/compare_cifar_6q_3L_cm_qcnn.pdf]

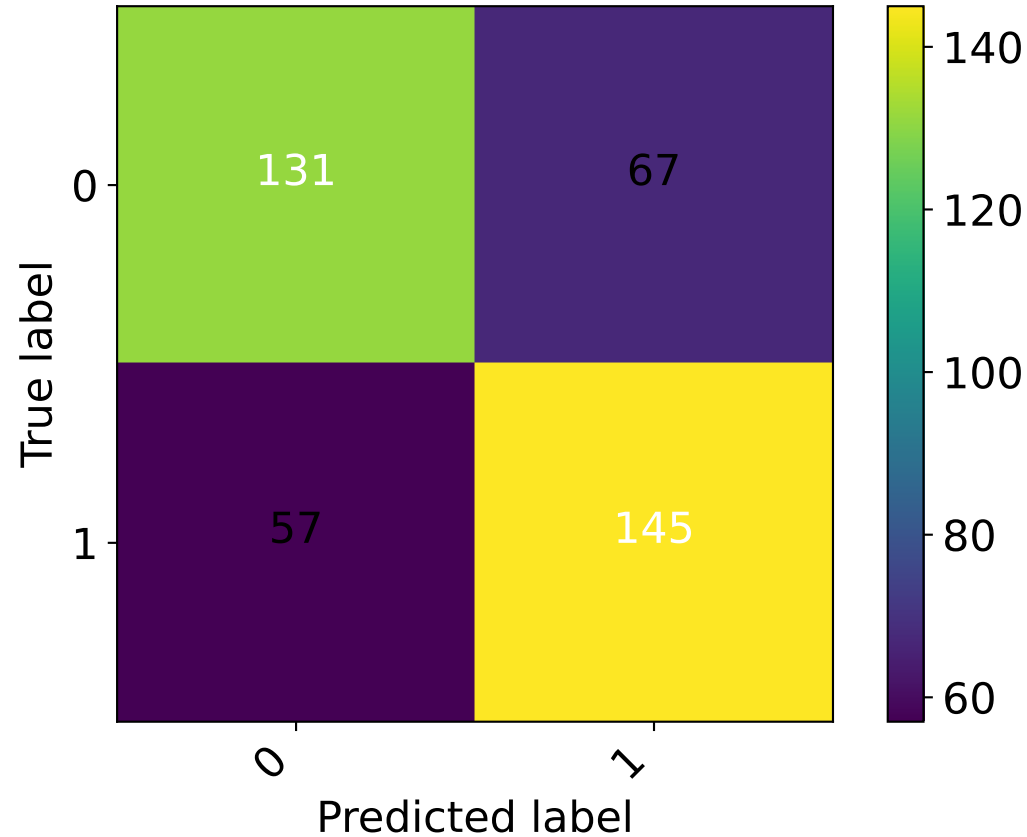

Supplement: supplementary_material [file compare_cifar_6q_3L_cm_qnn.pdf › rem/compare_cifar_6q_3L_cm_qnn.pdf]

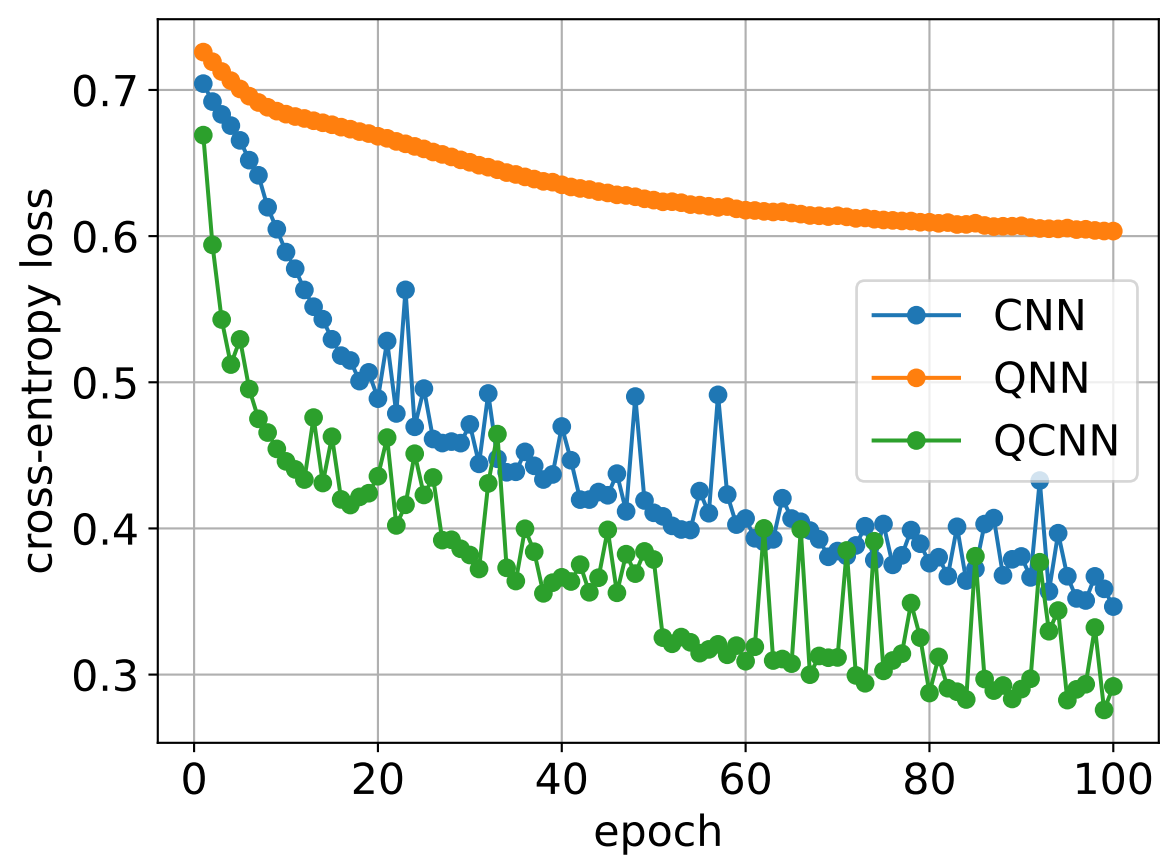

Supplement: supplementary_material [file compare_cifar_6q_3L_loss_vs_epoch.pdf › rem/compare_cifar_6q_3L_loss_vs_epoch.pdf]

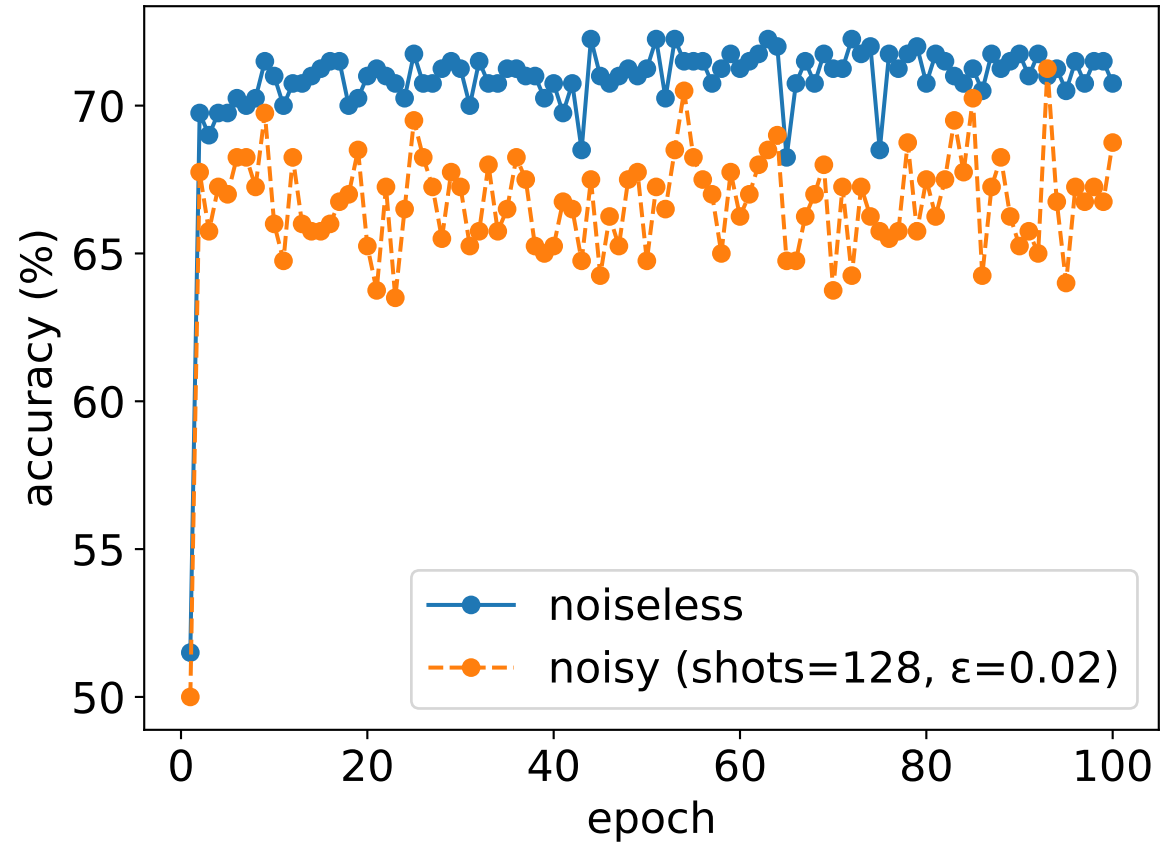

Supplement: supplementary_material [file compare_cifar_acc.pdf › rem/compare_cifar_acc.pdf]

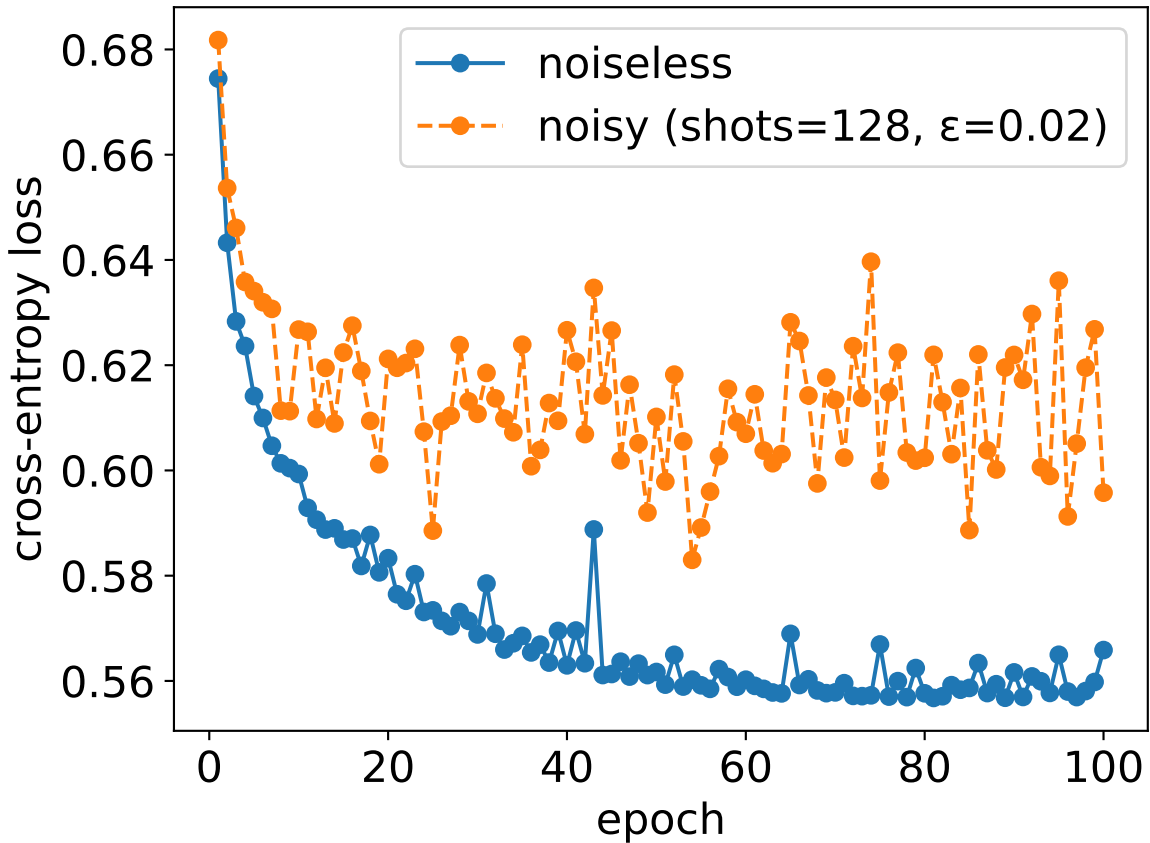

Supplement: supplementary_material [file compare_cifar_loss.pdf › rem/compare_cifar_loss.pdf]

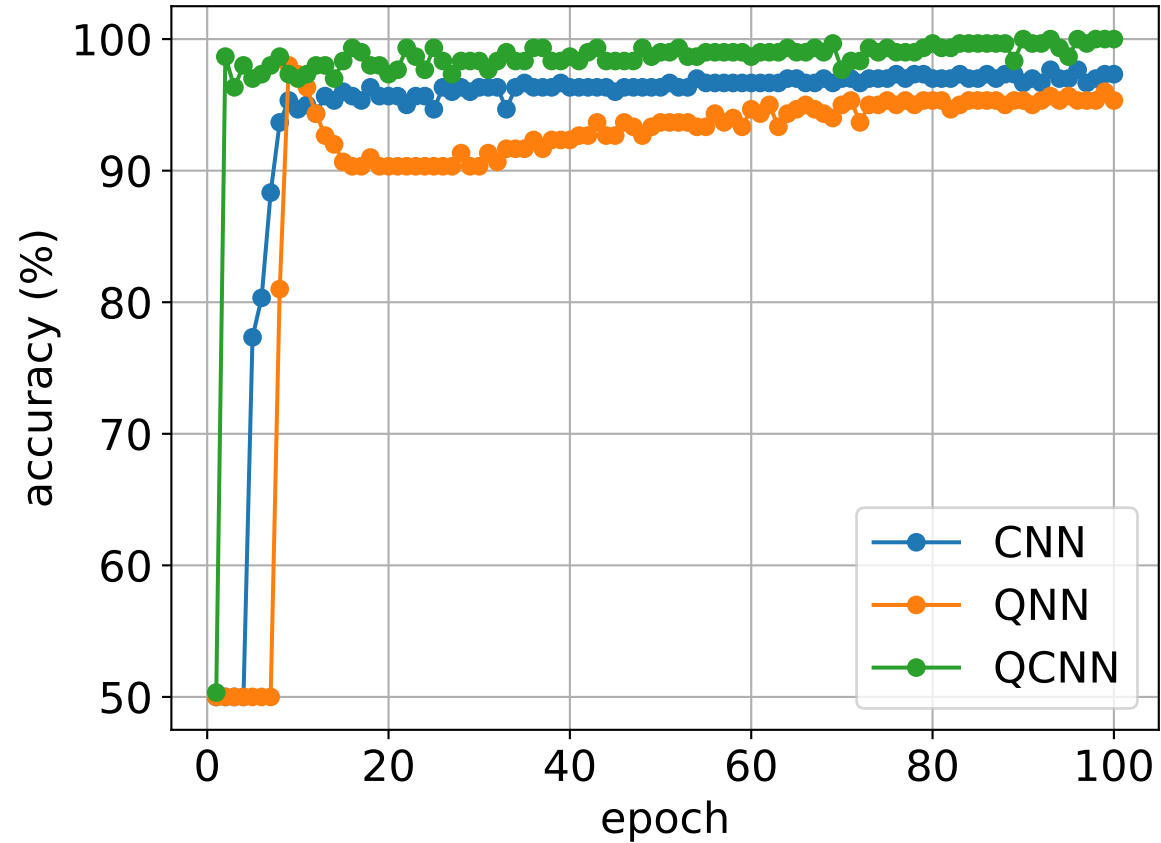

Supplement: supplementary_material [file compare_eurosat_6q_3L_acc_vs_epoch.pdf › rem/compare_eurosat_6q_3L_acc_vs_epoch.pdf]

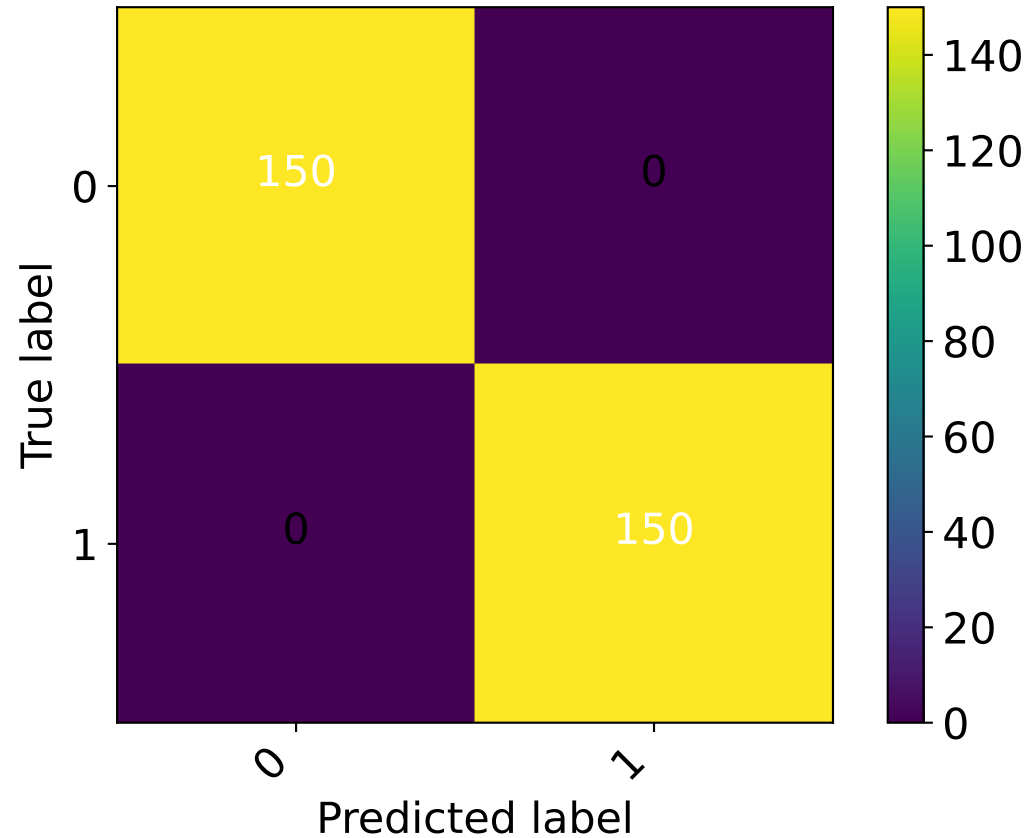

Supplement: supplementary_material [file compare_eurosat_6q_3L_cm_cnn.pdf › rem/compare_eurosat_6q_3L_cm_cnn.pdf]

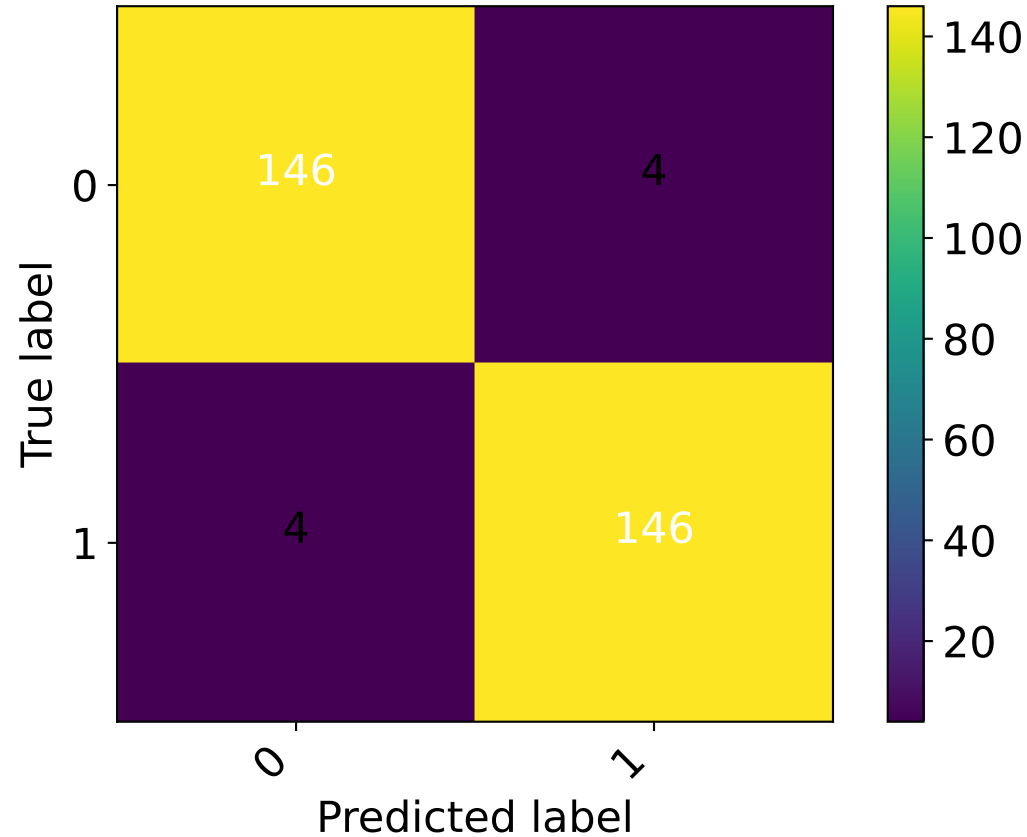

Supplement: supplementary_material [file compare_eurosat_6q_3L_cm_qcnn.pdf › rem/compare_eurosat_6q_3L_cm_qcnn.pdf]

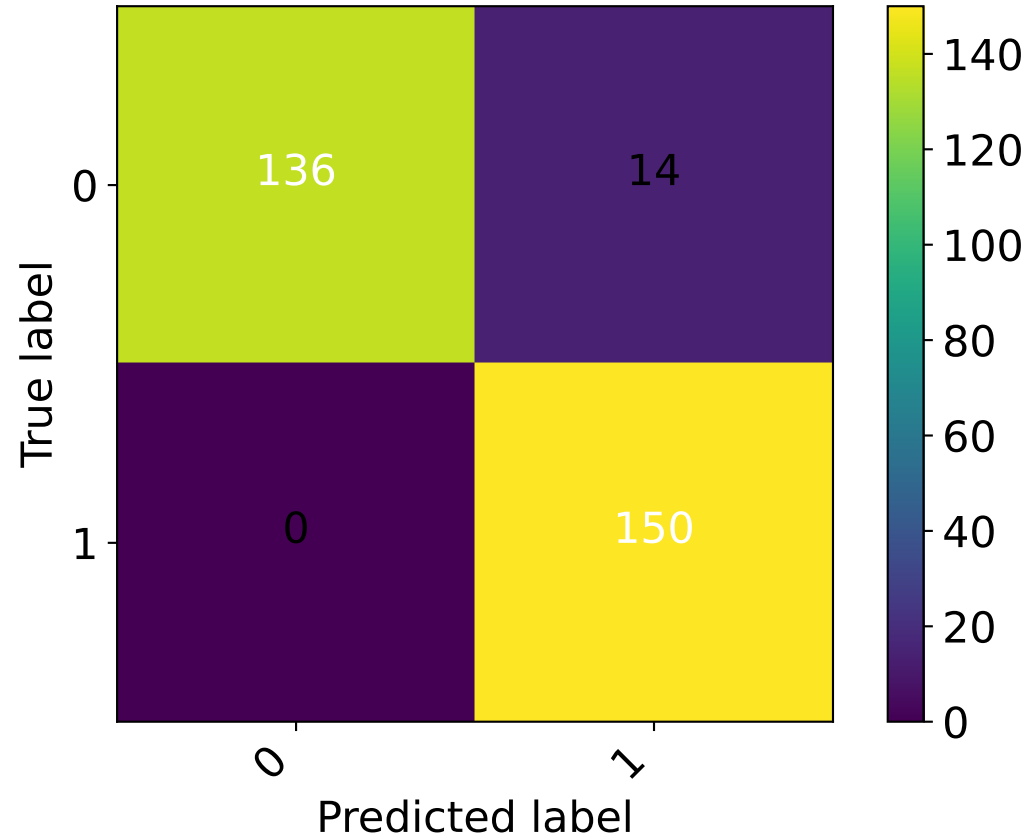

Supplement: supplementary_material [file compare_eurosat_6q_3L_cm_qnn.pdf › rem/compare_eurosat_6q_3L_cm_qnn.pdf]

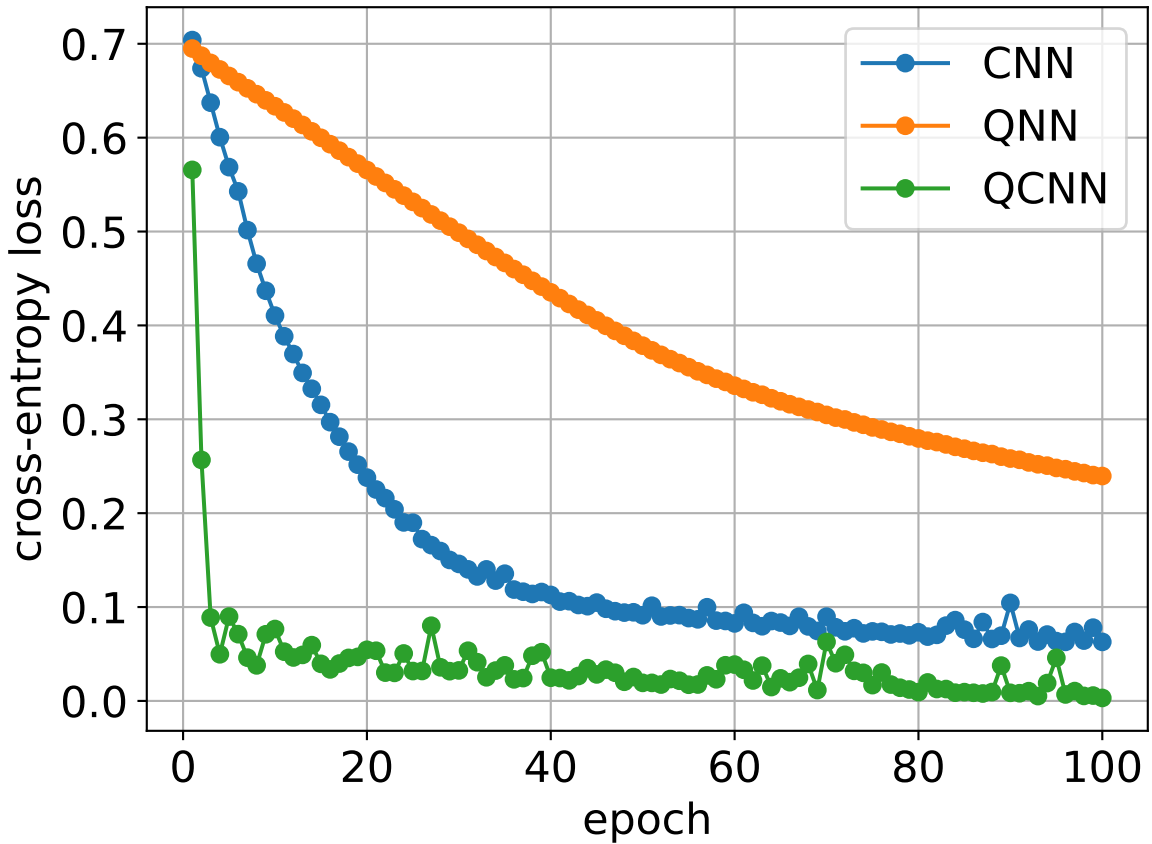

Supplement: supplementary_material [file compare_eurosat_6q_3L_loss_vs_epoch.pdf › rem/compare_eurosat_6q_3L_loss_vs_epoch.pdf]

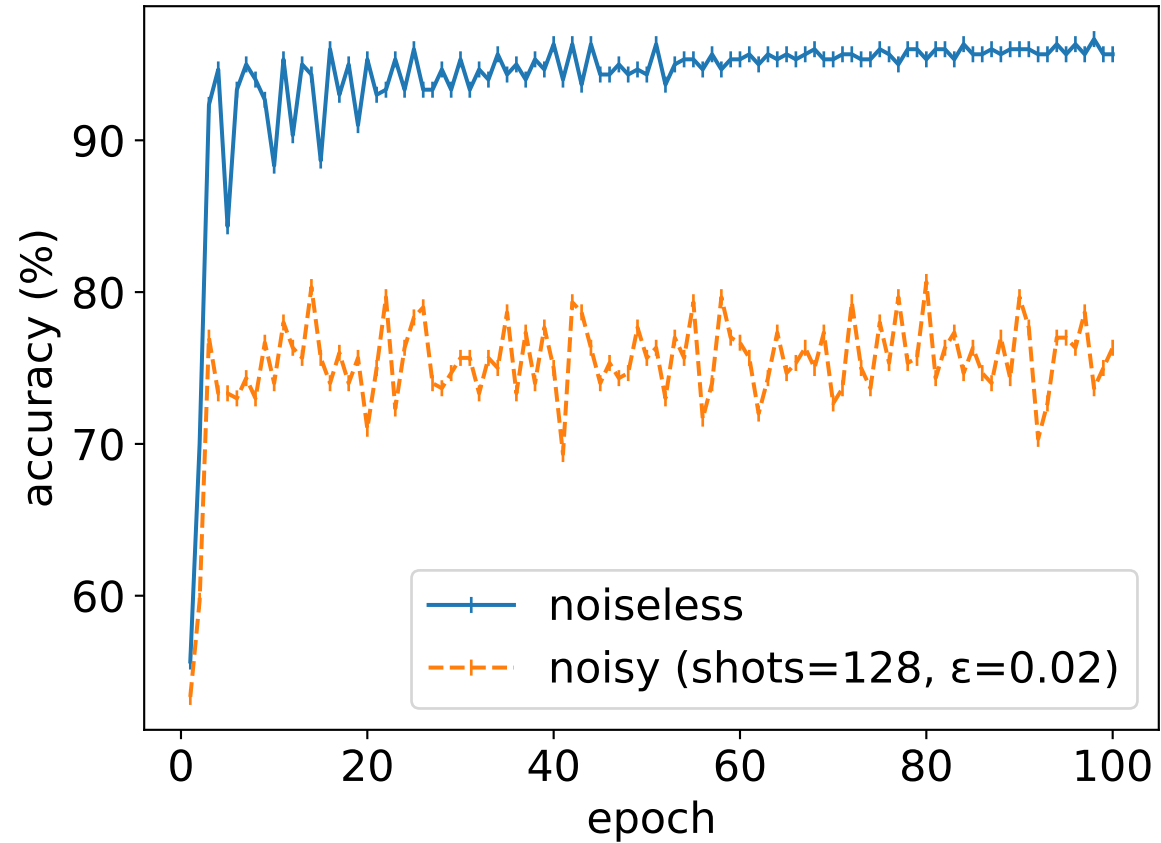

Supplement: supplementary_material [file compare_eurosat_acc.pdf › rem/compare_eurosat_acc.pdf]

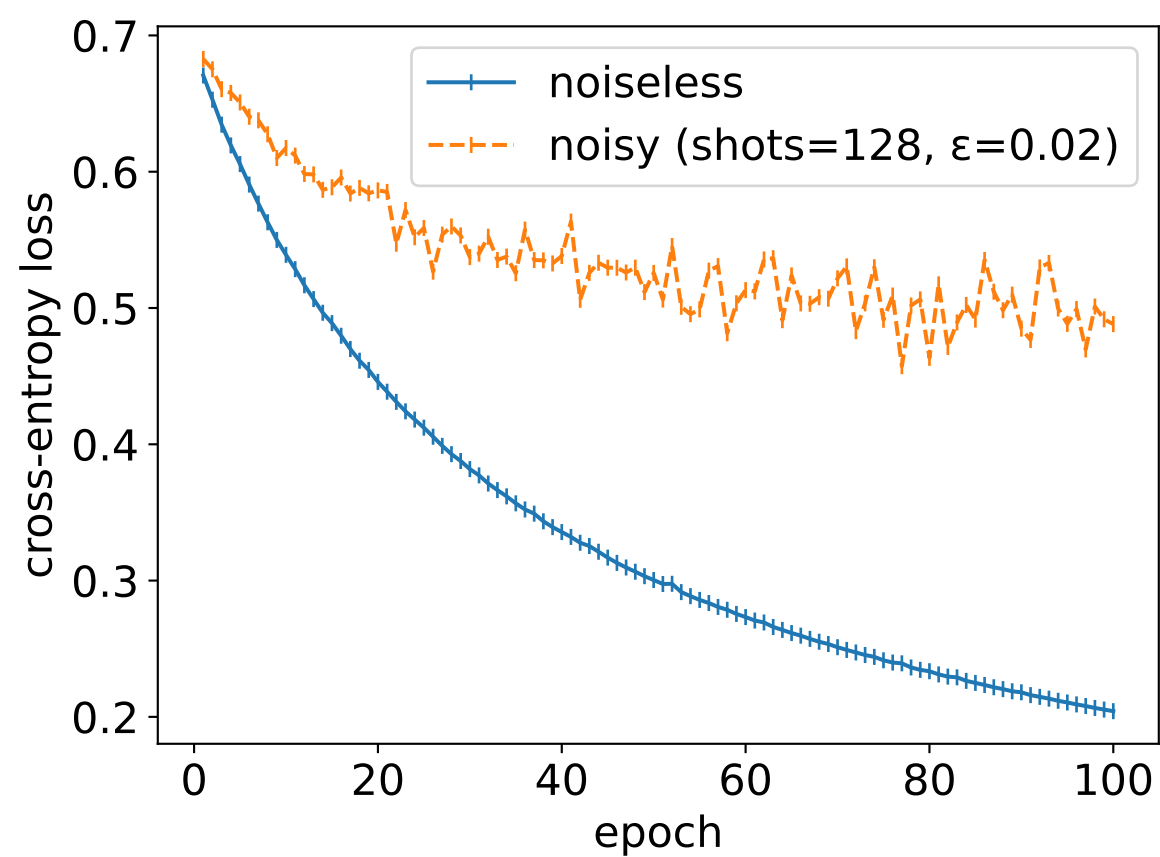

Supplement: supplementary_material [file compare_eurosat_loss.pdf › rem/compare_eurosat_loss.pdf]

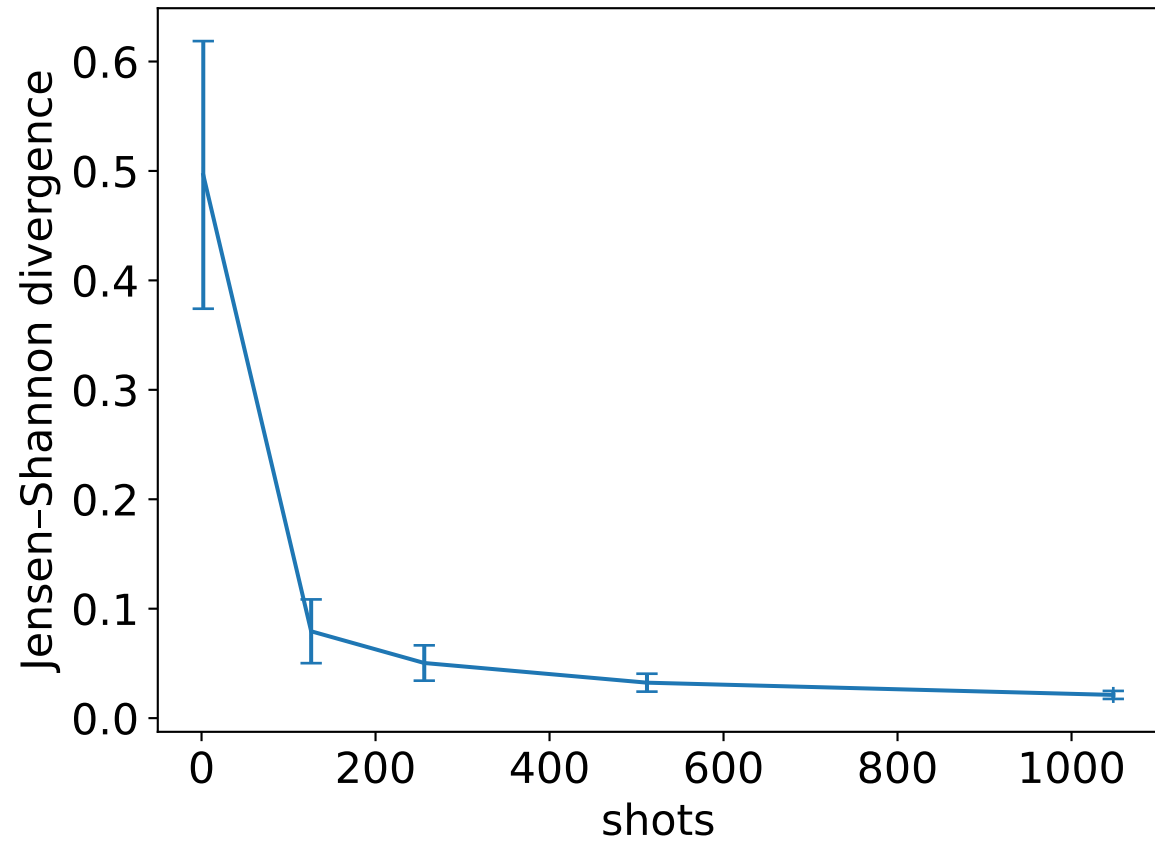

Supplement: supplementary_material [file eps002_jsd_vs_shots_eurosat.pdf › rem/eurosat/eps002_jsd_vs_shots_eurosat.pdf]

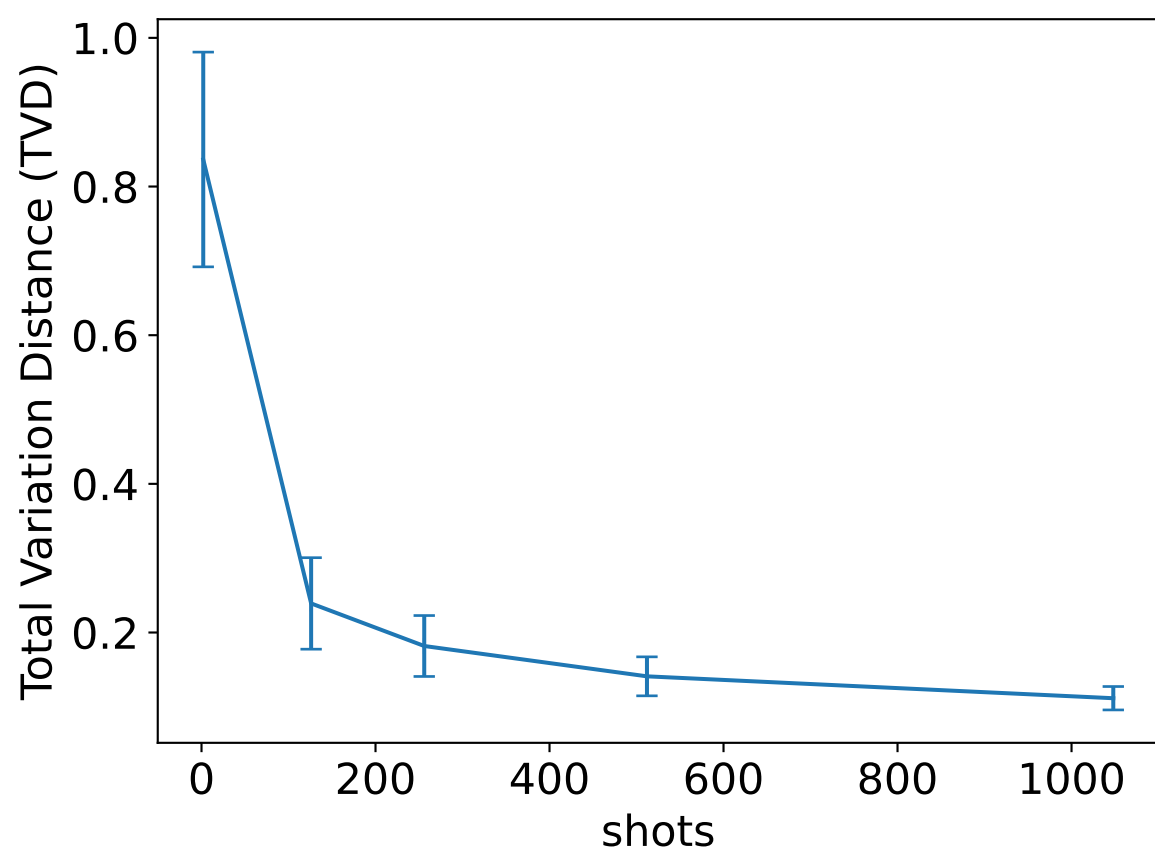

Supplement: supplementary_material [file eps002_tvd_vs_shots_eurosat.pdf › rem/eurosat/eps002_tvd_vs_shots_eurosat.pdf]

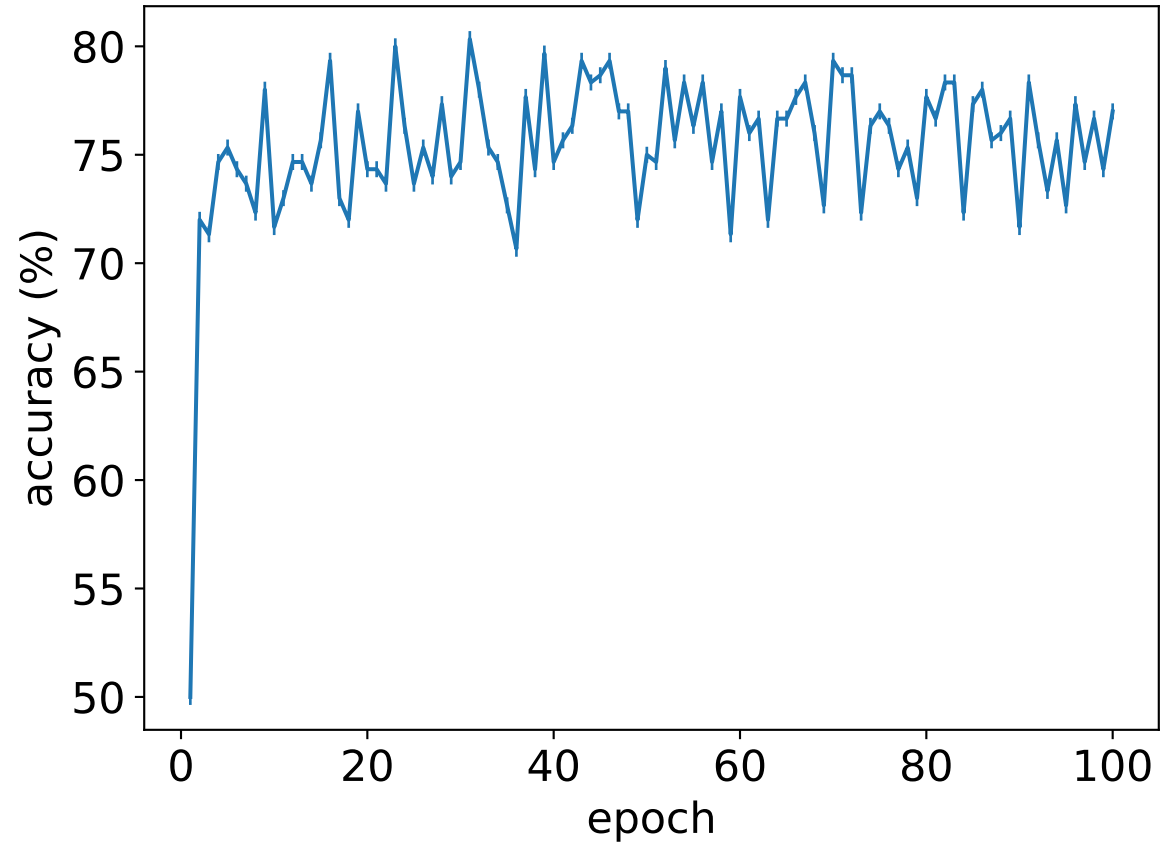

Supplement: supplementary_material [file fixed128_eurosat_acc.pdf › rem/eurosat/fixed128_eurosat_acc.pdf]

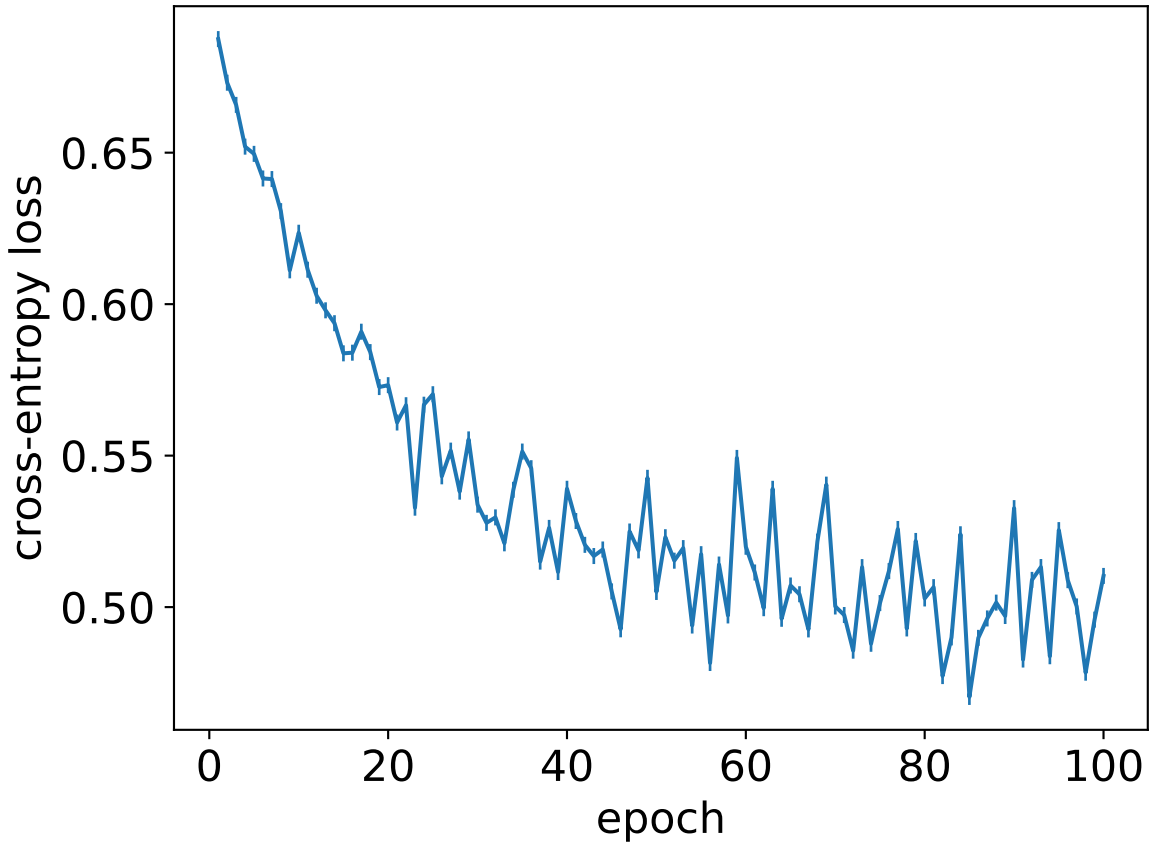

Supplement: supplementary_material [file fixed128_eurosat_loss.pdf › rem/eurosat/fixed128_eurosat_loss.pdf]

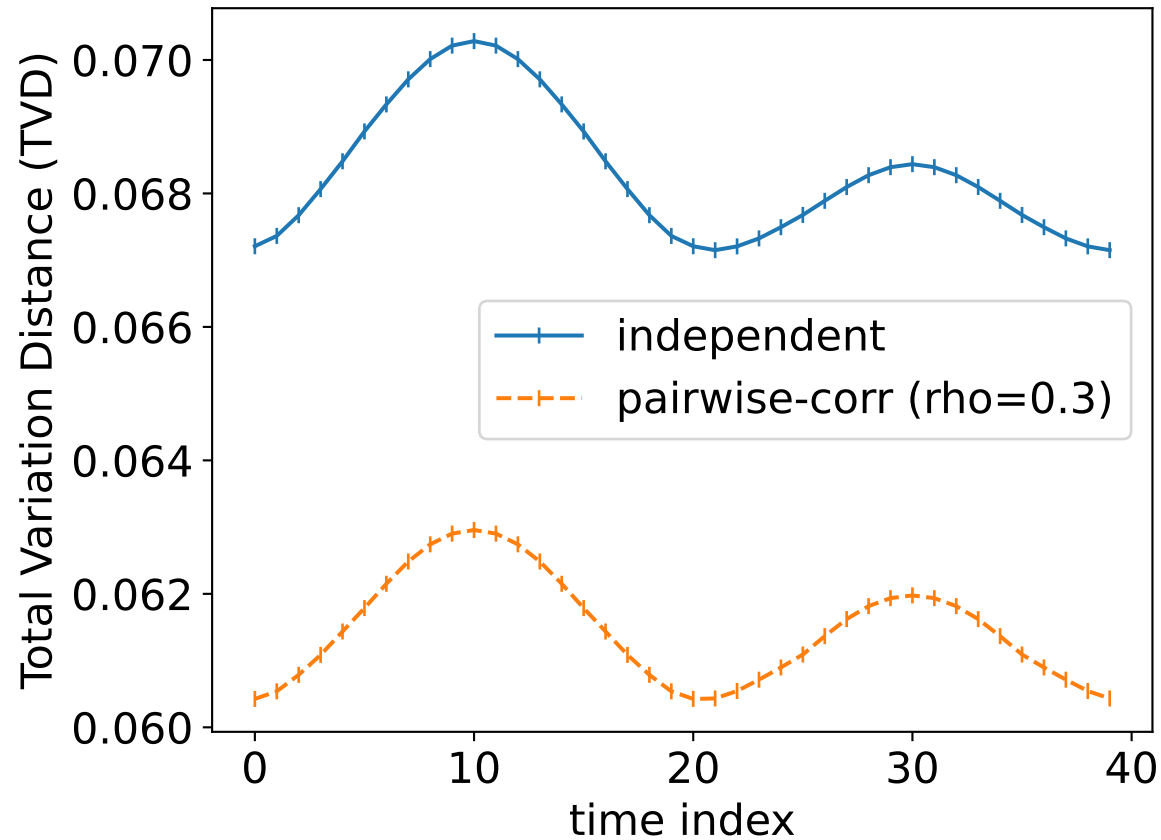

Supplement: supplementary_material [file readout_drift_eurosat_tvd.pdf › rem/eurosat/readout_drift_eurosat_tvd.pdf]

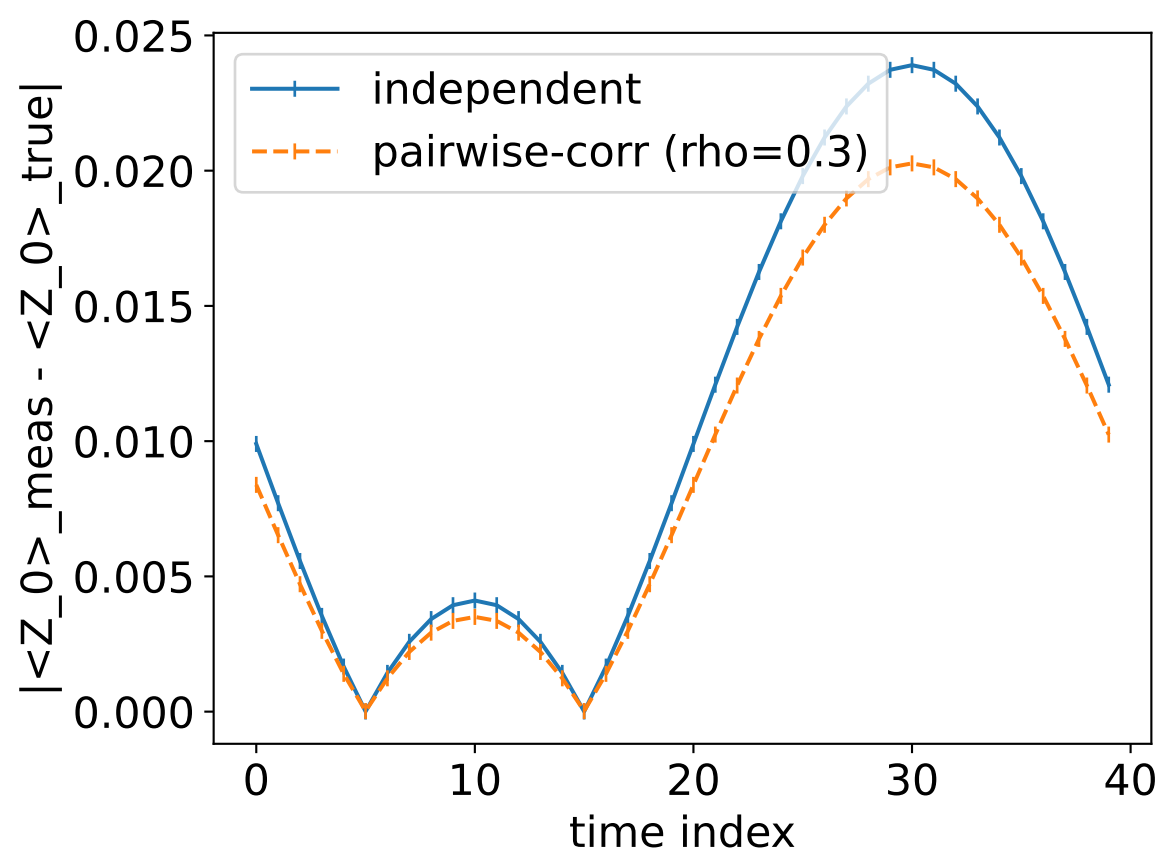

Supplement: supplementary_material [file readout_drift_eurosat_z0err.pdf › rem/eurosat/readout_drift_eurosat_z0err.pdf]

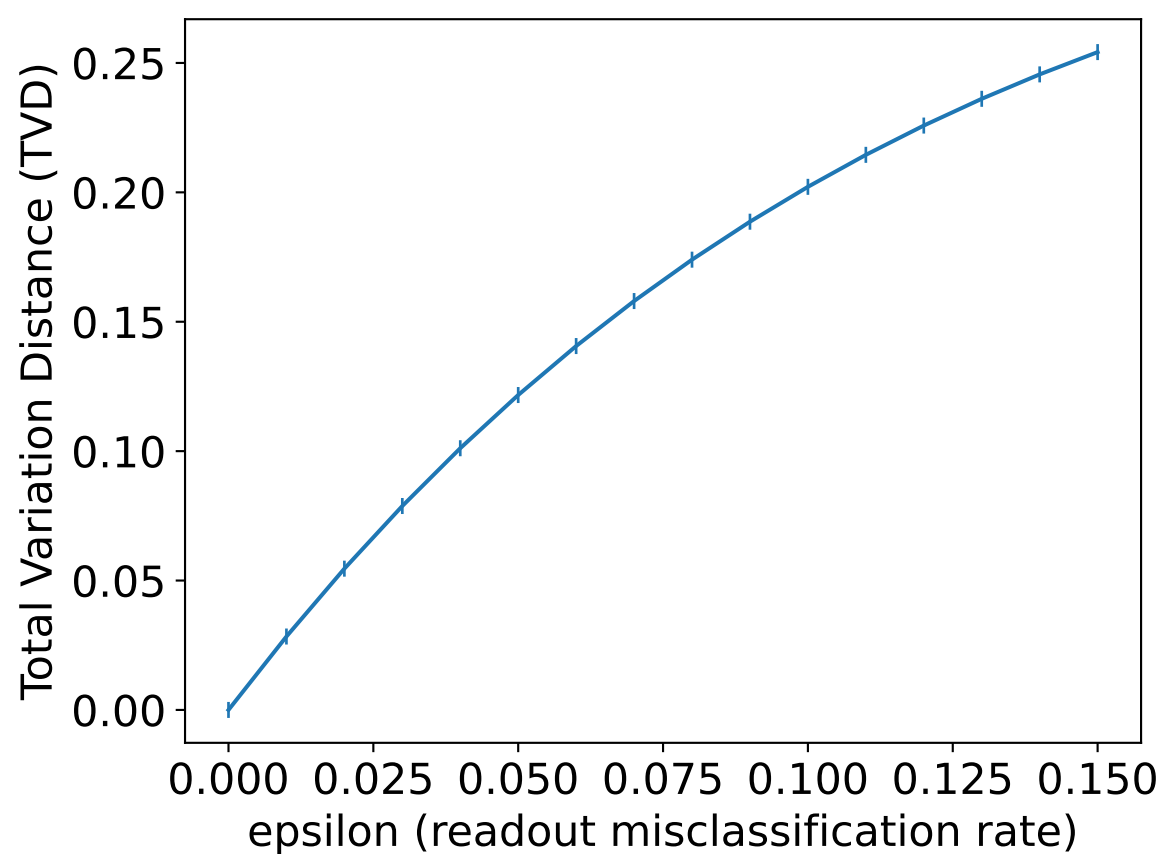

Supplement: supplementary_material [file readout_noise_effect_eurosat_tvd.pdf › rem/eurosat/readout_noise_effect_eurosat_tvd.pdf]

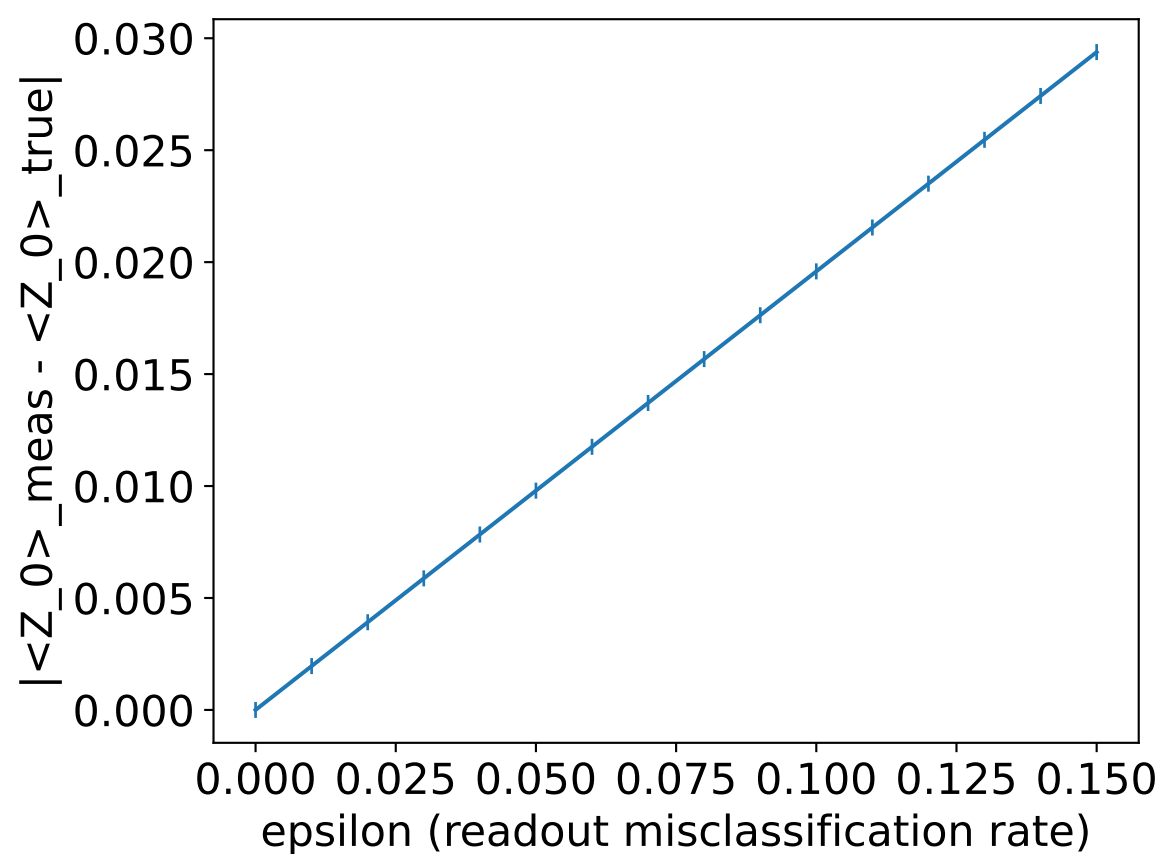

Supplement: supplementary_material [file readout_noise_effect_eurosat_z0err.pdf › rem/eurosat/readout_noise_effect_eurosat_z0err.pdf]

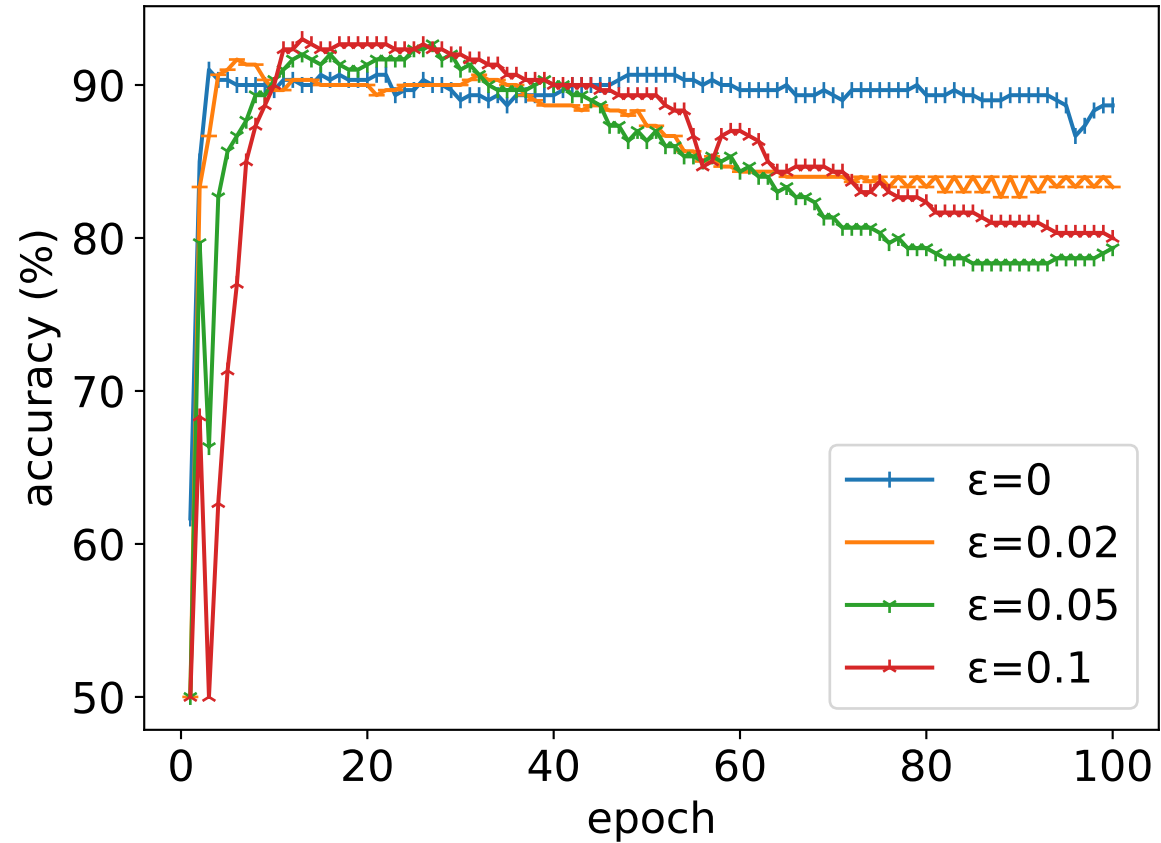

Supplement: supplementary_material [file readout_train_eurosat_acc.pdf › rem/eurosat/readout_train_eurosat_acc.pdf]

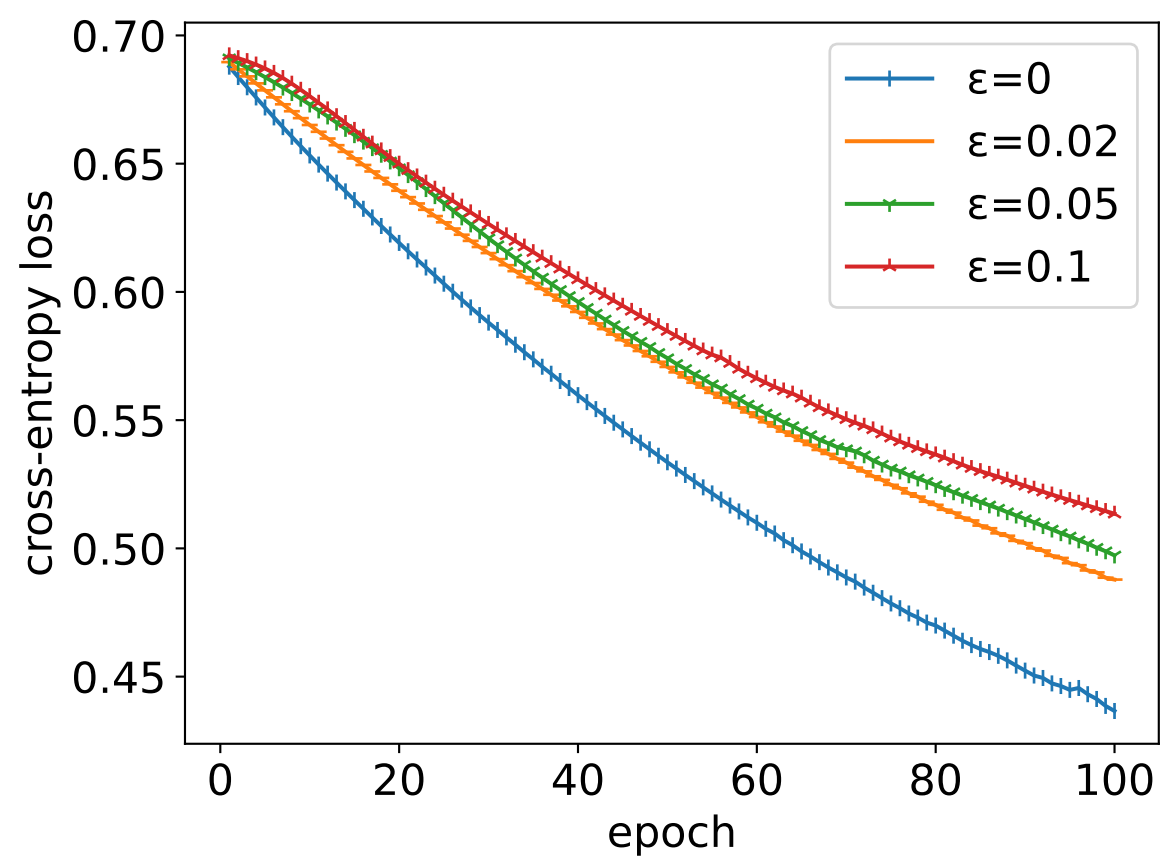

Supplement: supplementary_material [file readout_train_eurosat_loss.pdf › rem/eurosat/readout_train_eurosat_loss.pdf]

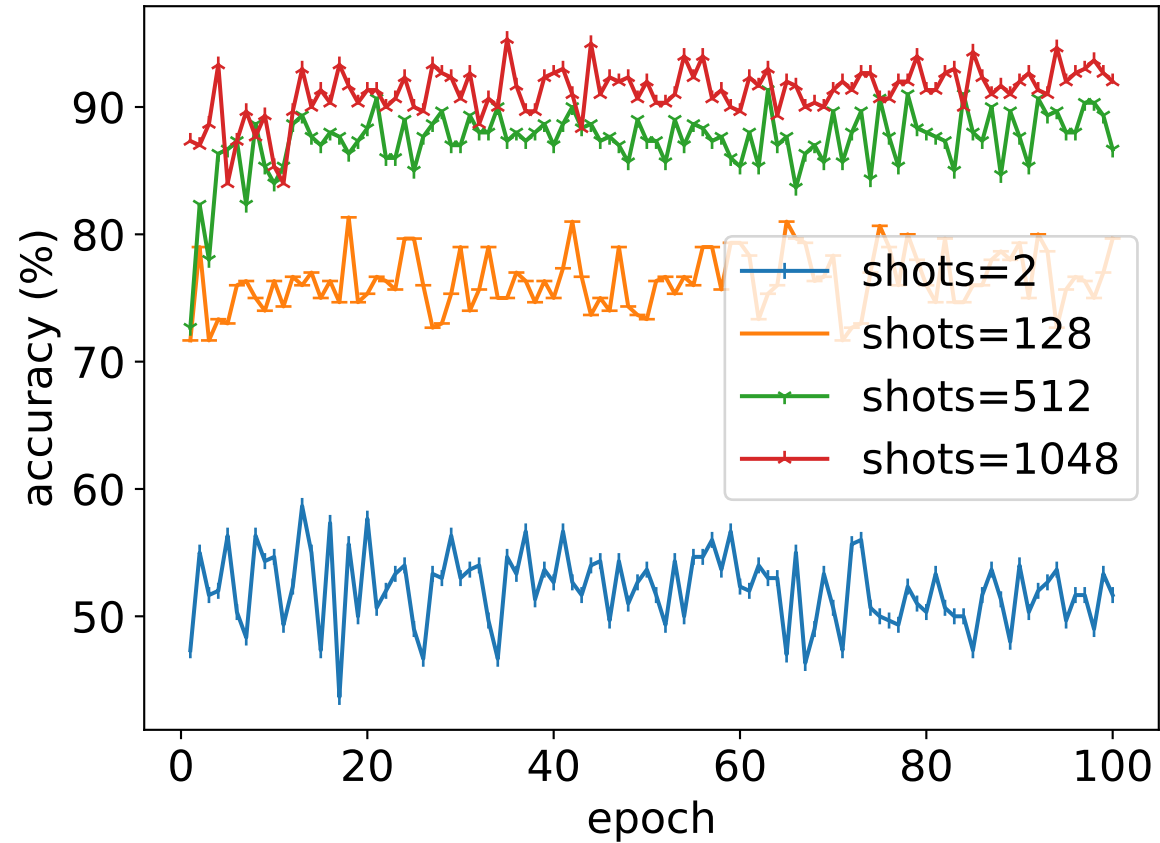

Supplement: supplementary_material [file shots_fast_eurosat_acc.pdf › rem/eurosat/shots_fast_eurosat_acc.pdf]

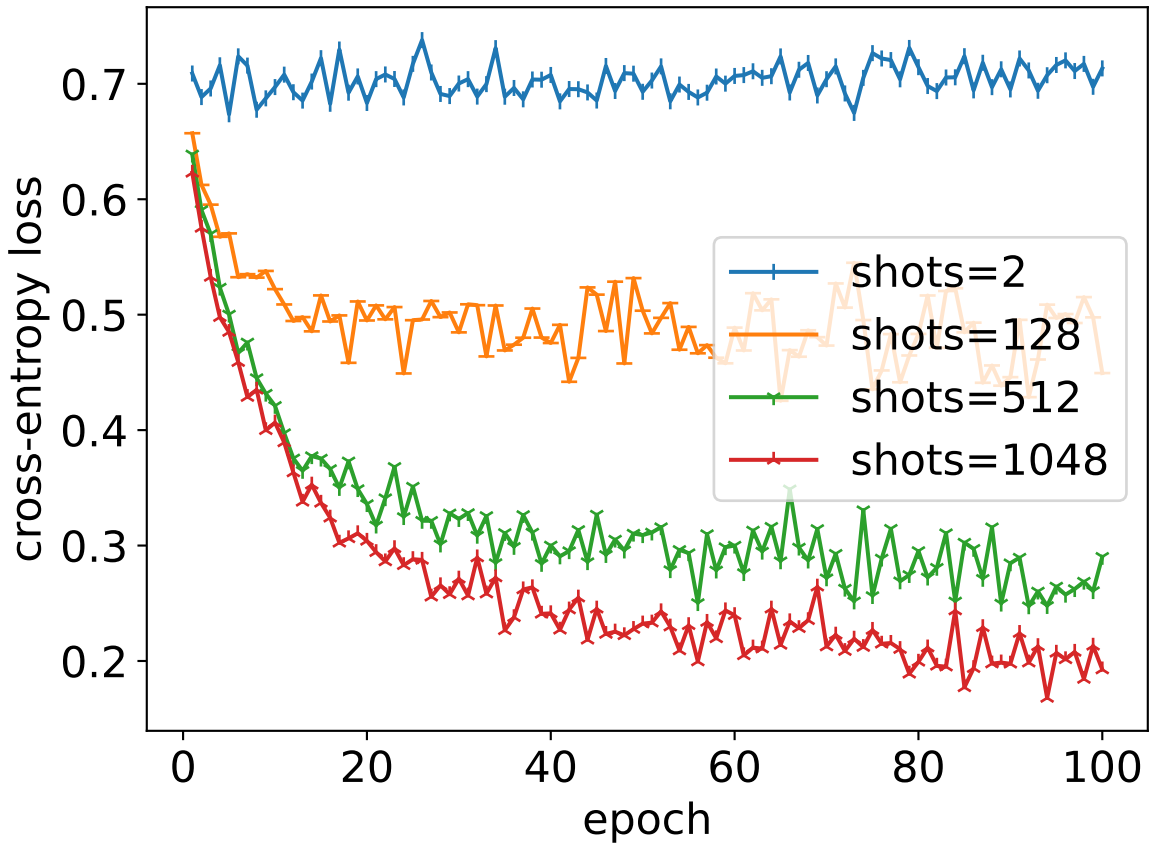

Supplement: supplementary_material [file shots_fast_eurosat_loss.pdf › rem/eurosat/shots_fast_eurosat_loss.pdf]
